# Supplementary material
Source: PubMed Central journal article supplement (PMC6648839)
Supplement: ao9b00333_si_001.pdf [file ao9b00333_si_001.pdf]

## Supporting Information

# ***Trans*-Diastereoselective Syntheses of $\gamma$ -Lactones by Visible Light-Iodine Mediated Carboesterification of Alkenes**

Saki Maejima<sup>a</sup>, Eiji Yamaguchi,<sup>\*a</sup> Akichika Itoh<sup>\*a</sup>

<sup>a</sup>Gifu Pharmaceutical University, 1-25-4 Daigaku-nishi, Gifu 501-1196, Japan

E-mail: yamaguchi@gifu-pu.ac.jp, itoha@gifu-pu.ac.jp

### ***Table of Contents***

---

|                                                                                      |            |
|--------------------------------------------------------------------------------------|------------|
| <b><i>Figure S1. General reaction set up</i></b>                                     | <b>S2</b>  |
| <b><i>Figure S2. The wave length and spectral irradiance of fluorescent lamp</i></b> | <b>S2</b>  |
| <b><i>Figure S3. UV-Vis absorption spectra of the iodine and styrene</i></b>         | <b>S3</b>  |
| <b><i>Table S1. Optimization of reaction conditions</i></b>                          | <b>S4</b>  |
| <b><i>Table S2. Optimization of bases</i></b>                                        | <b>S5</b>  |
| <b><i>Scheme S1. Reaction with radical scavenger</i></b>                             | <b>S6</b>  |
| <b><i>Scheme S2. Reaction of styrene 1a with iodine</i></b>                          | <b>S6</b>  |
| <b><i>Scheme S3. Reduction of 3a-I</i></b>                                           | <b>S6</b>  |
| <b><i>NMR spectra of lactones 3</i></b>                                              | <b>S7</b>  |
| <b><i>Figure S4. Key NOE of 3pa-cis</i></b>                                          | <b>S19</b> |
| <b><i>Figure S5. Key NOE of 3pa-trans</i></b>                                        | <b>S20</b> |
| <b><i>Figure S6. Key NOE of Diastereomer 3</i></b>                                   | <b>S21</b> |
| <b><i>Figure S7. Molecular structure of 3ha</i></b>                                  | <b>S24</b> |
| <b><i>Table S3. Experimental details</i></b>                                         | <b>S25</b> |
| <b><i>Table S4. Selected geometric parameters</i></b>                                | <b>S26</b> |
| <b><i>Reference</i></b>                                                              | <b>S28</b> |

---

**Figure S1. General reaction set up**

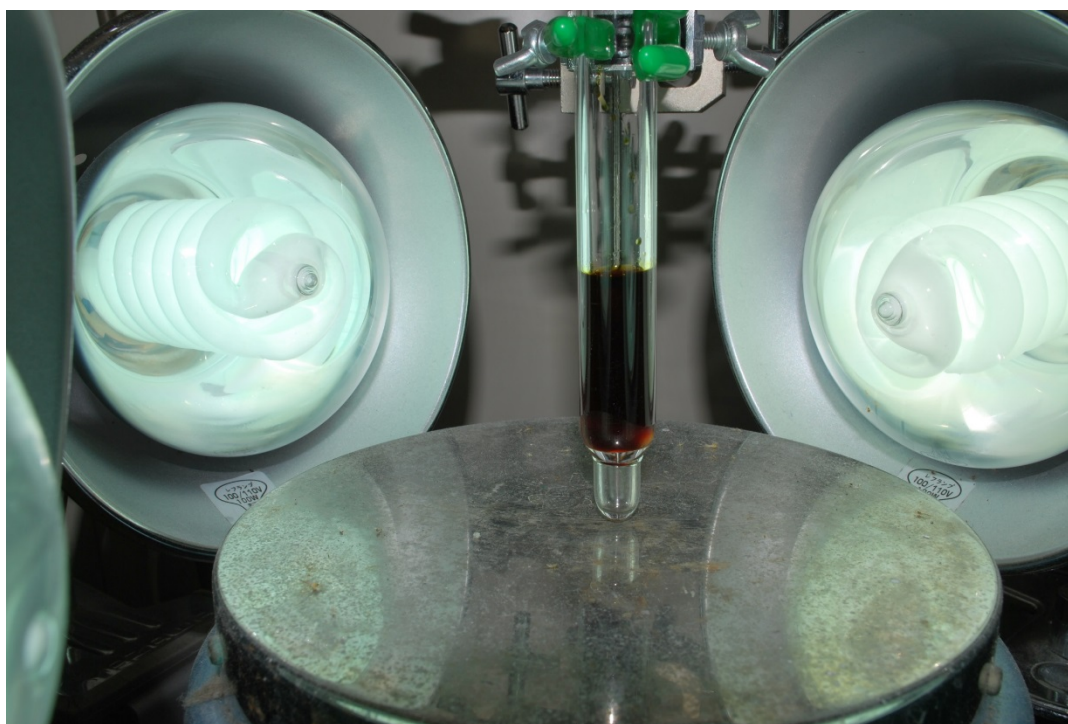

**Figure S2. The wave length and spectral irradiance of fluorescent lamp (ERF25ED/22-SP-F)**

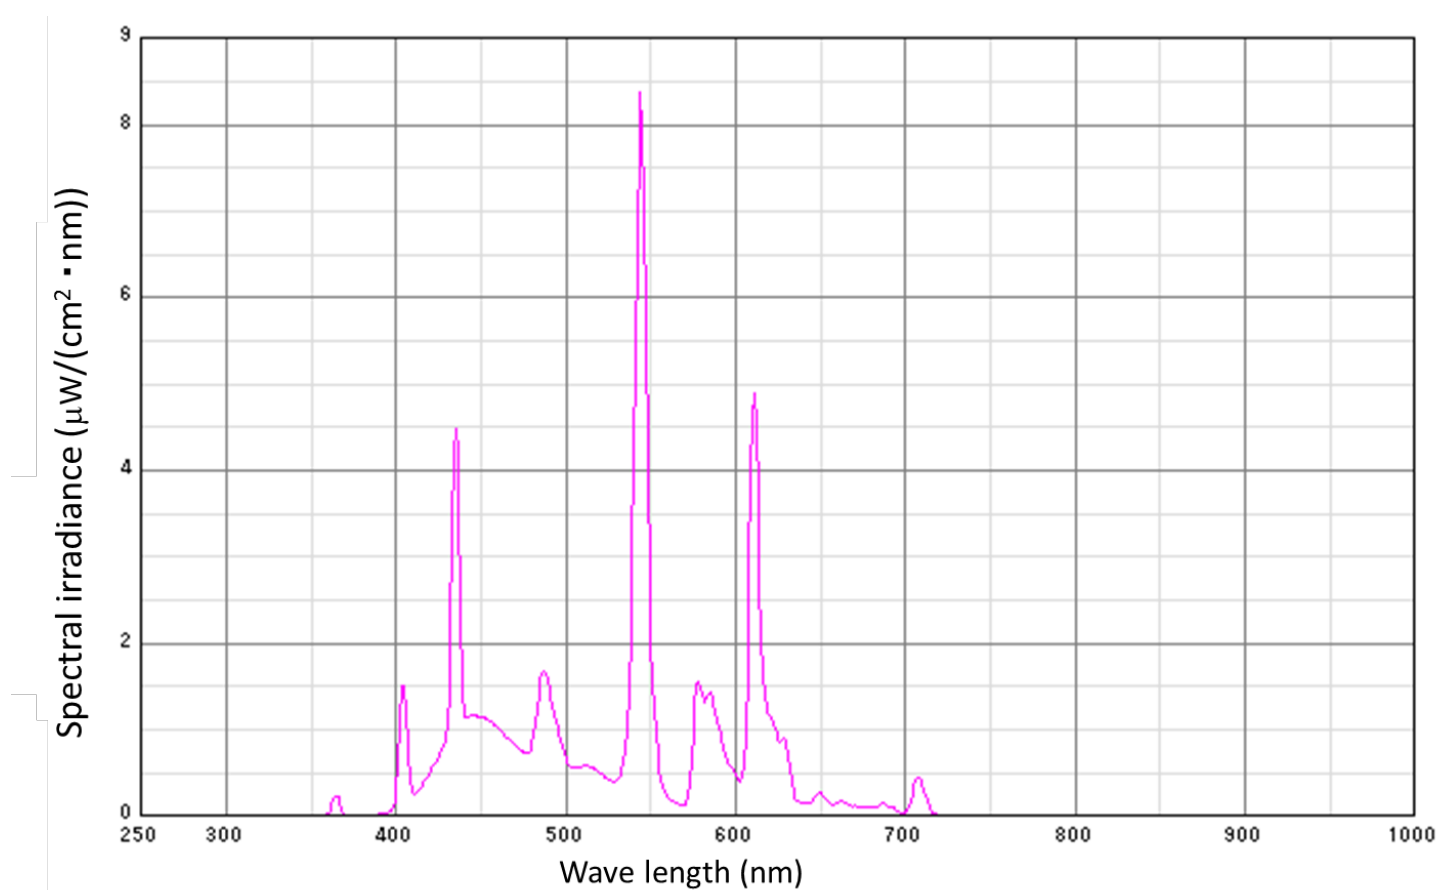

**Figure S3. UV/Vis absorption spectra of the iodine and styrene**

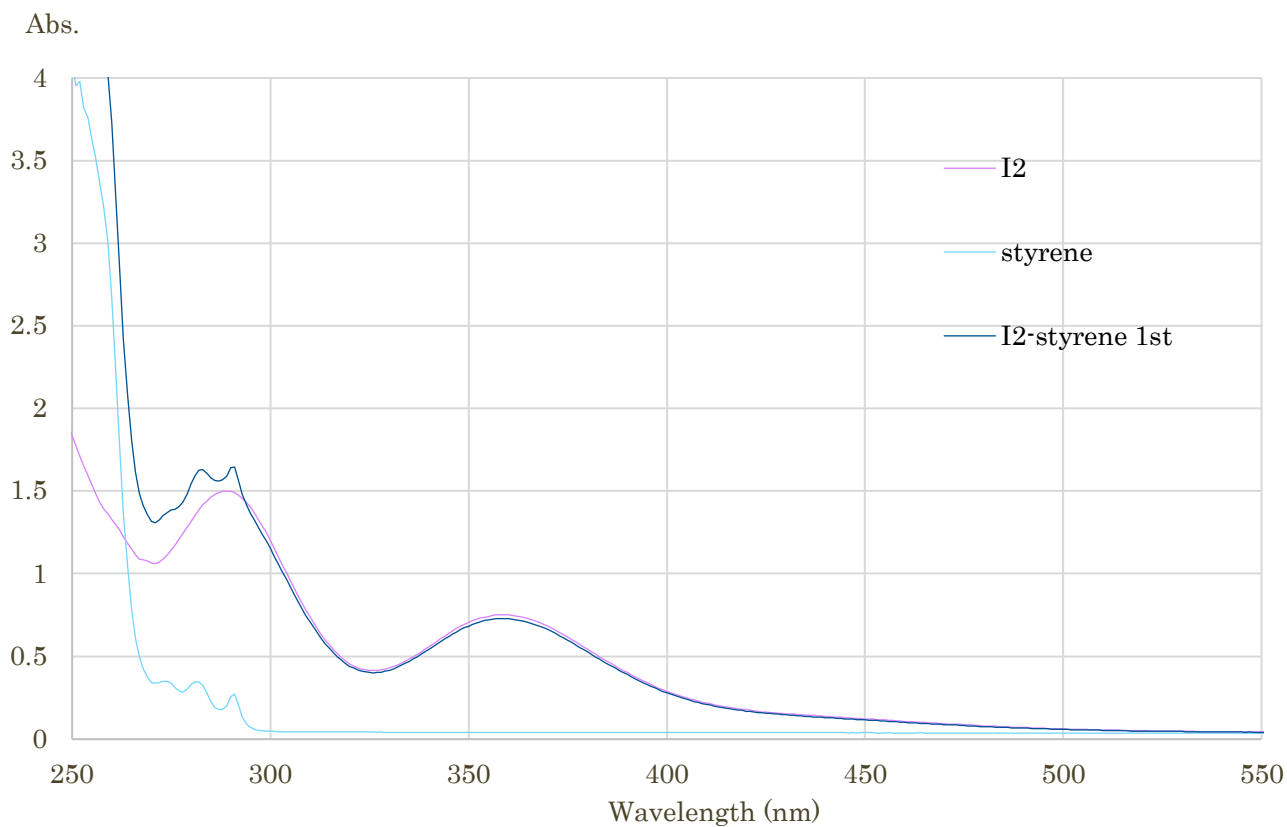

The *t*BuOH solution were prepared to  $1.0 \times 10^{-4}$  M, and the UV/Vis absorption spectra of  $I_2$ , styrene and  $I_2$ /styrene were measured.

|                      | Wavelength (nm) | Abs. |                        | Wavelength (nm) | Abs.  |                               | Wavelength (nm) | Abs.  |
|----------------------|-----------------|------|------------------------|-----------------|-------|-------------------------------|-----------------|-------|
| $I_2$ ( $10^{-4}$ M) | 359             | 0.75 | Styrene ( $10^{-4}$ M) | 291             | 0.26  | $I_2$ /Styrene ( $10^{-4}$ M) | 359             | 0.727 |
|                      | 289             | 1.50 |                        | 282             | 0.345 |                               | 291             | 1.643 |

**Table S1. Optimization of reaction conditions**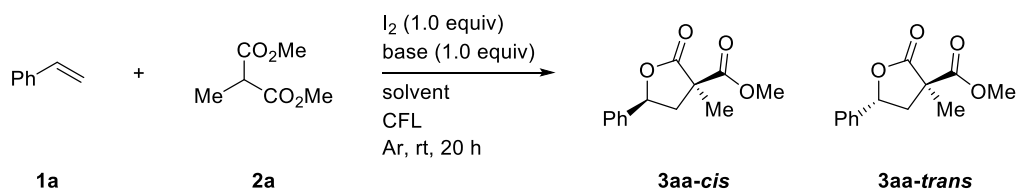

| entry           | base                            | solvent             | <b>3aa</b> yield (%) | <i>dr</i> ( <i>cis</i> : <i>trans</i> ) <sup>a</sup> |
|-----------------|---------------------------------|---------------------|----------------------|------------------------------------------------------|
| 1               | Ca(OH) <sub>2</sub>             | MeOH                | 17                   | 33:67                                                |
| 2               | Ca(OH) <sub>2</sub>             | EtOH                | 67 <sup>b</sup>      | 48:52                                                |
| 3               | Ca(OH) <sub>2</sub>             | IPA                 | 85 <sup>b</sup>      | 48:42                                                |
| 4               | Ca(OH) <sub>2</sub>             | <sup>t</sup> AmylOH | 74                   | 66:34                                                |
| 5               | Ca(OH) <sub>2</sub>             | <sup>t</sup> BuOH   | 83                   | 79:21                                                |
| 6 <sup>c</sup>  | Ca(OH) <sub>2</sub>             | <sup>t</sup> BuOH   | 23                   | 70:30                                                |
| 7               | Mg(OH) <sub>2</sub>             | <sup>t</sup> BuOH   | trace                | -                                                    |
| 8               | Ba(OH) <sub>2</sub>             | <sup>t</sup> BuOH   | 74                   | 67:33                                                |
| 9               | Sr(OH) <sub>2</sub>             | <sup>t</sup> BuOH   | 33                   | 50:50                                                |
| 10              | BaCO <sub>3</sub>               | <sup>t</sup> BuOH   | trace                | -                                                    |
| 11              | SrCO <sub>3</sub>               | <sup>t</sup> BuOH   | trace                | -                                                    |
| 12              | NaHCO <sub>3</sub>              | <sup>t</sup> BuOH   | 32                   | 50:50                                                |
| 13              | Na <sub>2</sub> CO <sub>3</sub> | <sup>t</sup> BuOH   | 77                   | 45:55                                                |
| 14              | K <sub>2</sub> CO <sub>3</sub>  | <sup>t</sup> BuOH   | 53                   | 40:60                                                |
| 15              | Cs <sub>2</sub> CO <sub>3</sub> | <sup>t</sup> BuOH   | 49                   | 37:63                                                |
| 16              | KOH                             | <sup>t</sup> BuOH   | 36                   | 33:67                                                |
| 17              | K <sub>3</sub> PO <sub>4</sub>  | <sup>t</sup> BuOH   | 26                   | 30:70                                                |
| 18              | -                               | <sup>t</sup> BuOH   | no reaction          | -                                                    |
| 19 <sup>d</sup> | Ca(OH) <sub>2</sub>             | <sup>t</sup> BuOH   | no reaction          | -                                                    |

<sup>a</sup> Diastereomeric ratio were determined by <sup>1</sup>H NMR analysis of crude reaction mixture.

<sup>b</sup> Transesterification product was also included.

<sup>c</sup> 0.5 equiv of I<sub>2</sub> was used.

<sup>d</sup> Without iodine.

**Table S2. Optimization of bases**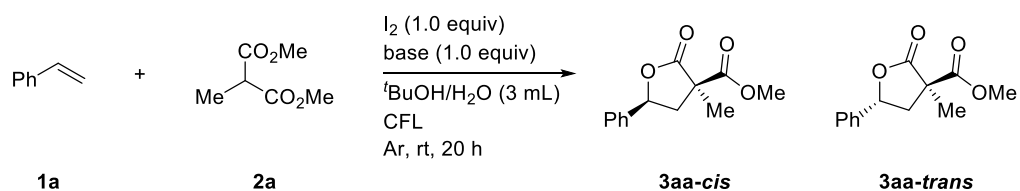

| entry | base                            | <b>3aa</b> yield (%) | <i>dr</i> ( <i>cis</i> : <i>trans</i> ) <sup>a</sup> |
|-------|---------------------------------|----------------------|------------------------------------------------------|
| 1     | Mg(OH) <sub>2</sub>             | 65                   | 34:66                                                |
| 2     | Ca(OH) <sub>2</sub>             | 61                   | 40:60                                                |
| 3     | Sr(OH) <sub>2</sub>             | 29                   | 42:58                                                |
| 4     | Ba(OH) <sub>2</sub>             | 7                    | 29:71                                                |
| 5     | SrCO <sub>3</sub>               | trace                | -                                                    |
| 6     | BaCO <sub>3</sub>               | trace                | -                                                    |
| 7     | NaOH                            | 20                   | 25:75                                                |
| 8     | KOH                             | trace                | -                                                    |
| 9     | NaHCO <sub>3</sub>              | 20                   | 25:75                                                |
| 10    | Li <sub>2</sub> CO <sub>3</sub> | 60                   | 29:71                                                |
| 11    | Na <sub>2</sub> CO <sub>3</sub> | 69                   | 25:75                                                |
| 12    | K <sub>2</sub> CO <sub>3</sub>  | 60                   | 26:74                                                |
| 13    | Cs <sub>2</sub> CO <sub>3</sub> | 56                   | 28:72                                                |
| 14    | K <sub>3</sub> PO <sub>4</sub>  | 41                   | 27:73                                                |

<sup>a</sup> Diastereomeric ratio were determined by <sup>1</sup>H NMR analysis of crude reaction mixture.

### Scheme S1. Reaction with radical scavenger<sup>S1</sup>

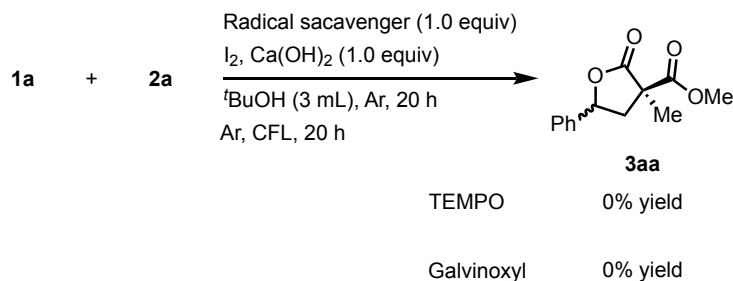

A Pyrex<sup>®</sup> test tube (16.5 cm × 1.5 cm) containing a mixture of dimethyl 2-methylmalonate **2a** (44 mg, 0.30 mmol), I<sub>2</sub> (76 mg, 1.0 equiv., 0.30 mmol), calcium hydroxide (22 mg, 1.0 equiv., 0.30 mmol), styrene **1a** (63 mg, 2.0 equiv., 0.60 mmol) and radical scavenger (1.0 equiv., 0.30 mmol) in *t*-Butylalcohol (3.0 mL) was degassed *via* FPT cycling for three times and backfilled with Ar. The resulting solution was stirred at ambient temperature for 20 h. The reaction was quenched with sat. Na<sub>2</sub>S<sub>2</sub>O<sub>3</sub> aq. and extracted with Et<sub>2</sub>O (10 mL × 3). The combined organic layers were washed with brine, dried over Mg<sub>2</sub>SO<sub>4</sub>, filtered and concentrated *in vacuo*. The reaction was inhibited in both TEMPO and Galvinoxyl, and lactone **3aa** was not obtained.

### Scheme S2. Reaction of styrene 1a with iodine

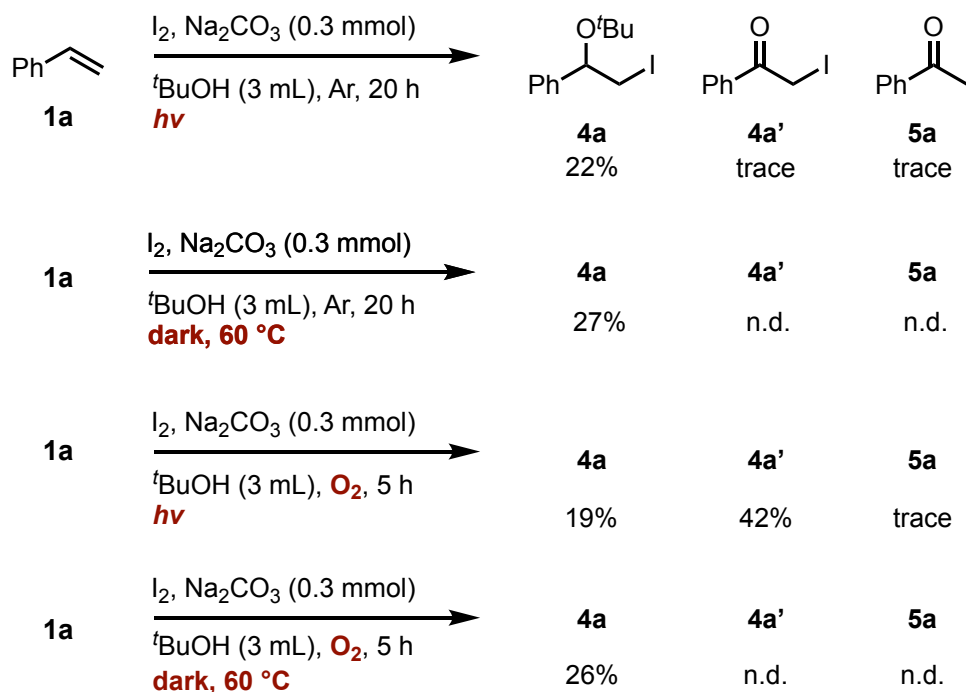

### Scheme S3. Reduction of 3a-I

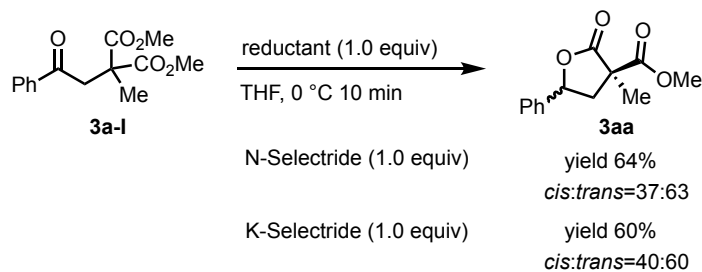

### NMR spectra of lactones 3

3aa' cis 1H.esp

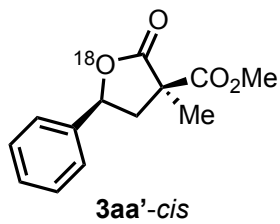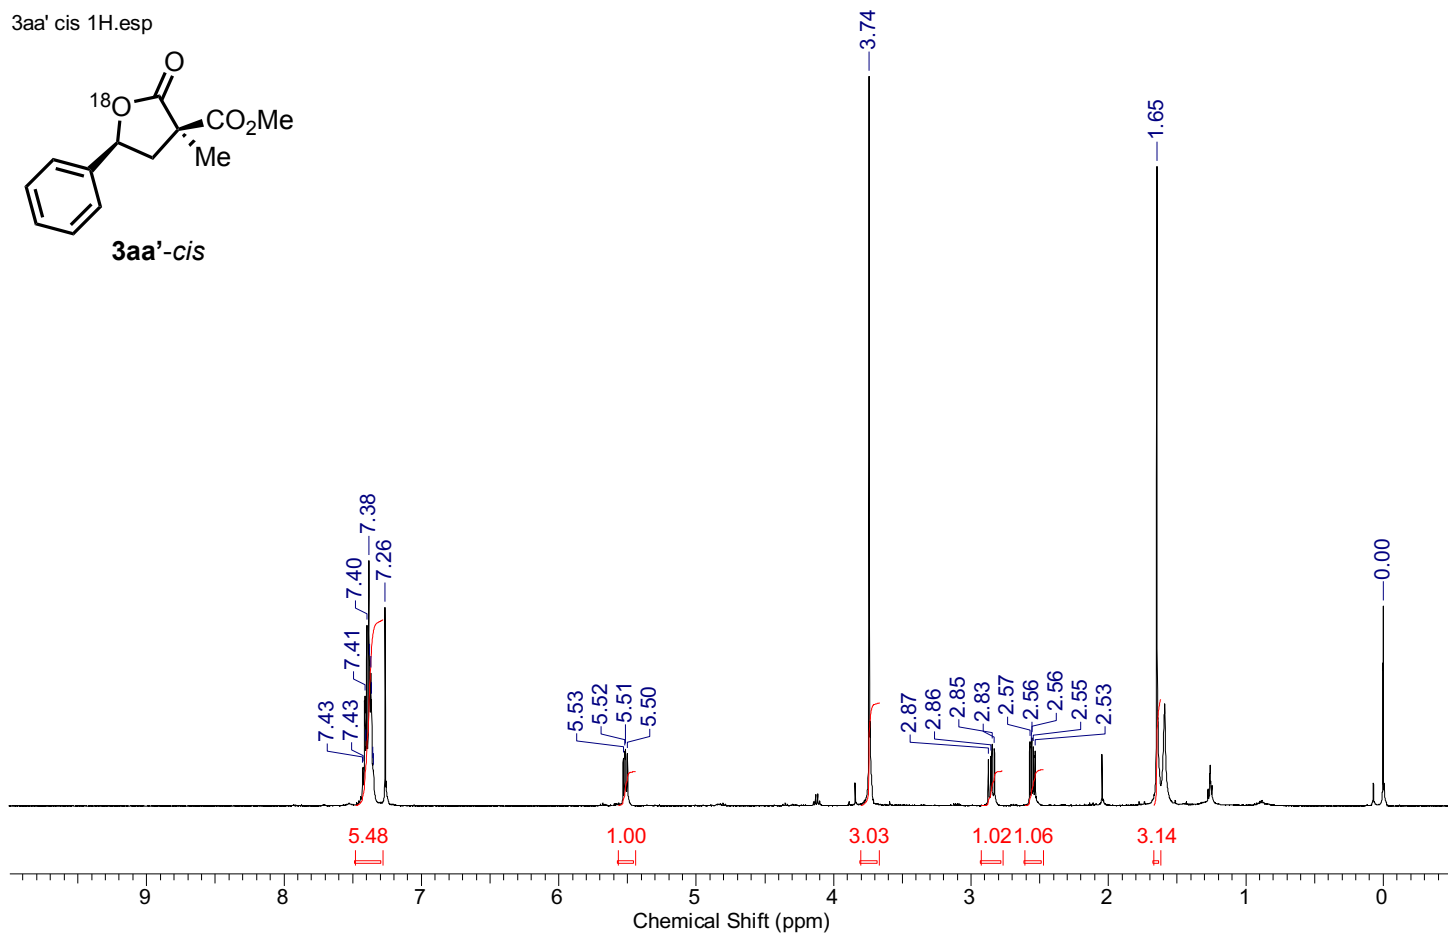

3aa' cis 13C-1.esp

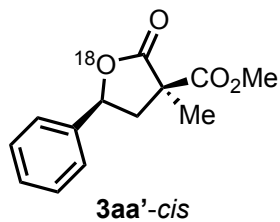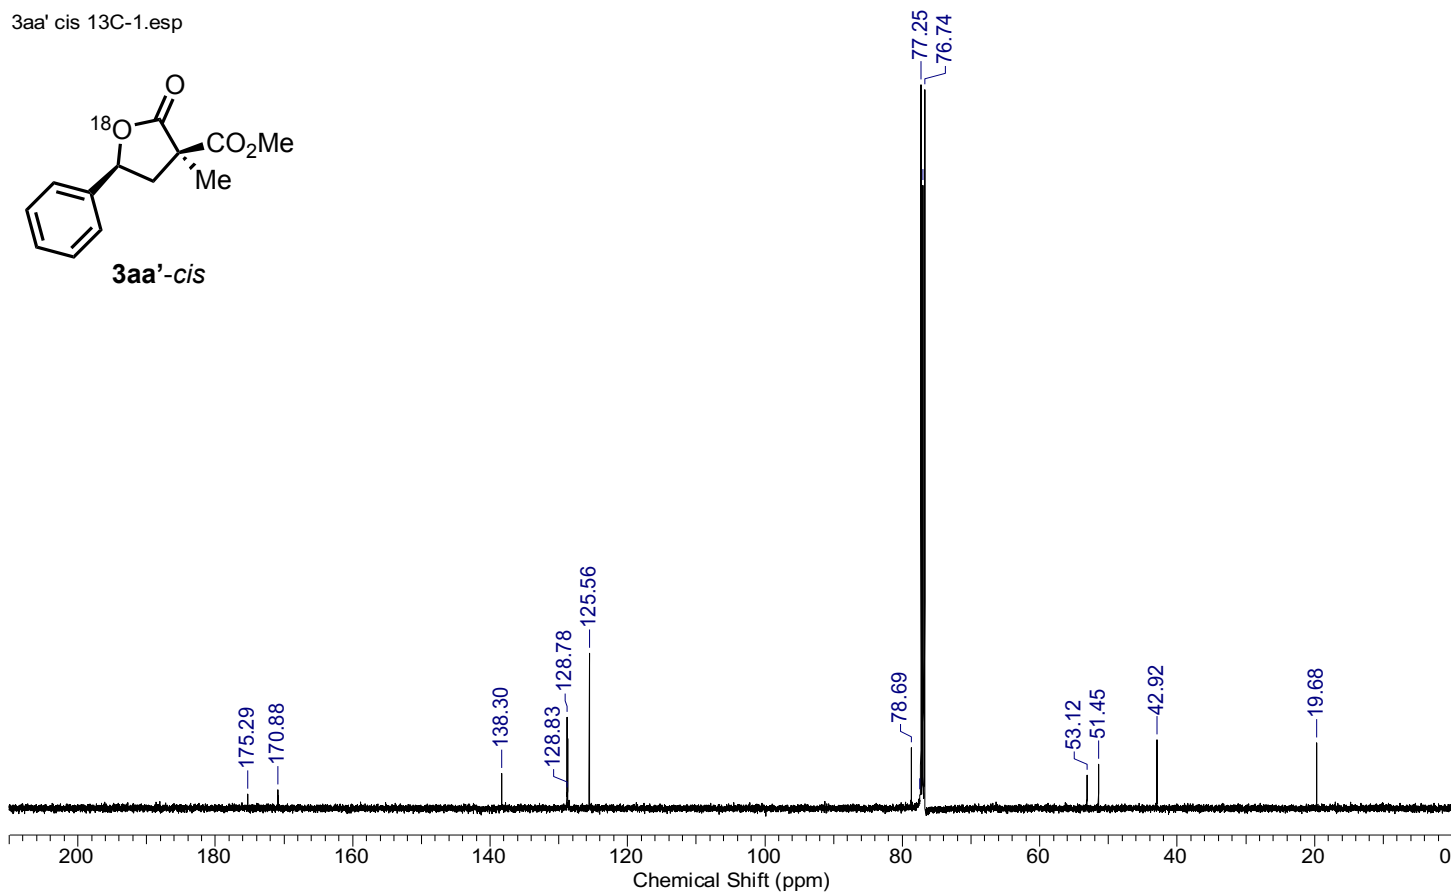

3aa' trans 1H.esp

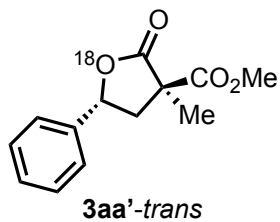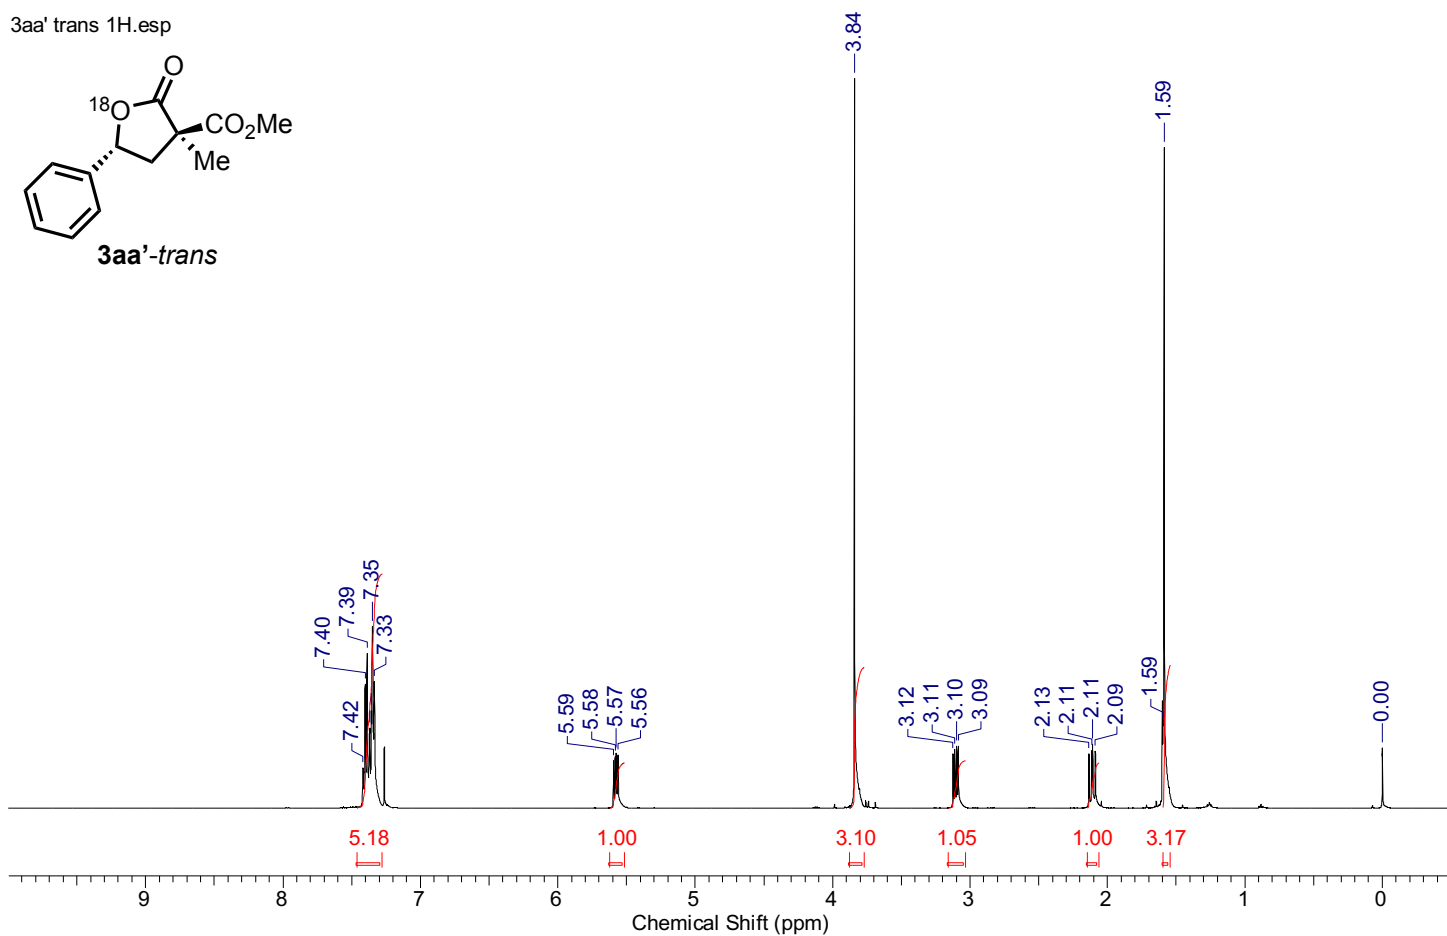

3aa' trans 13C-1.esp

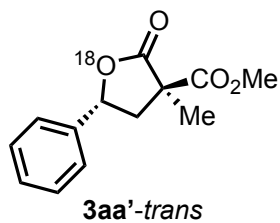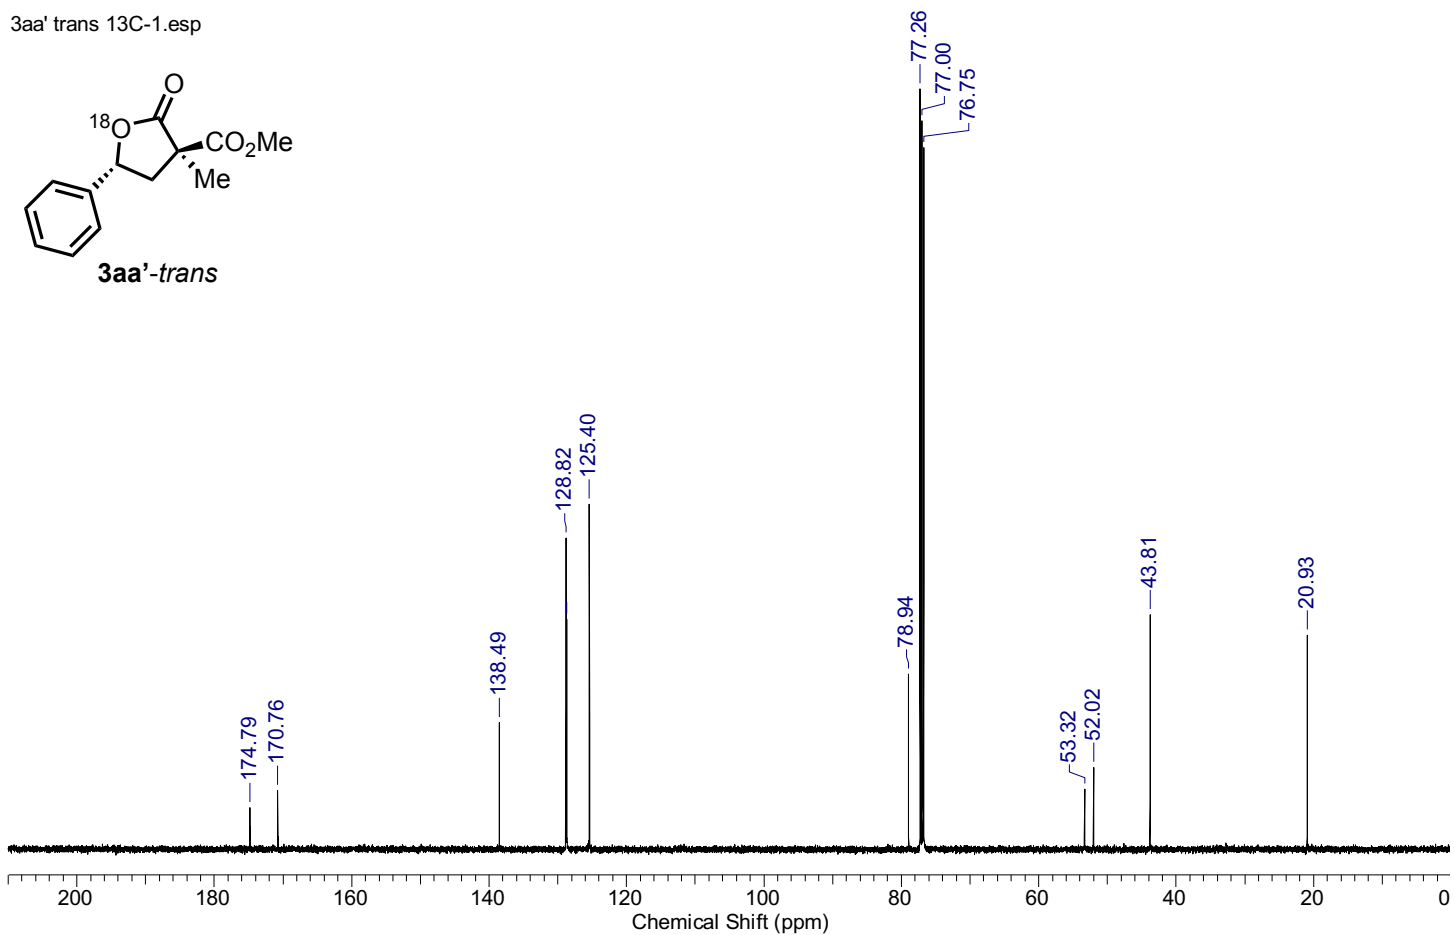



a-methyl cis major 1H.esp

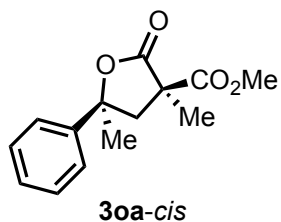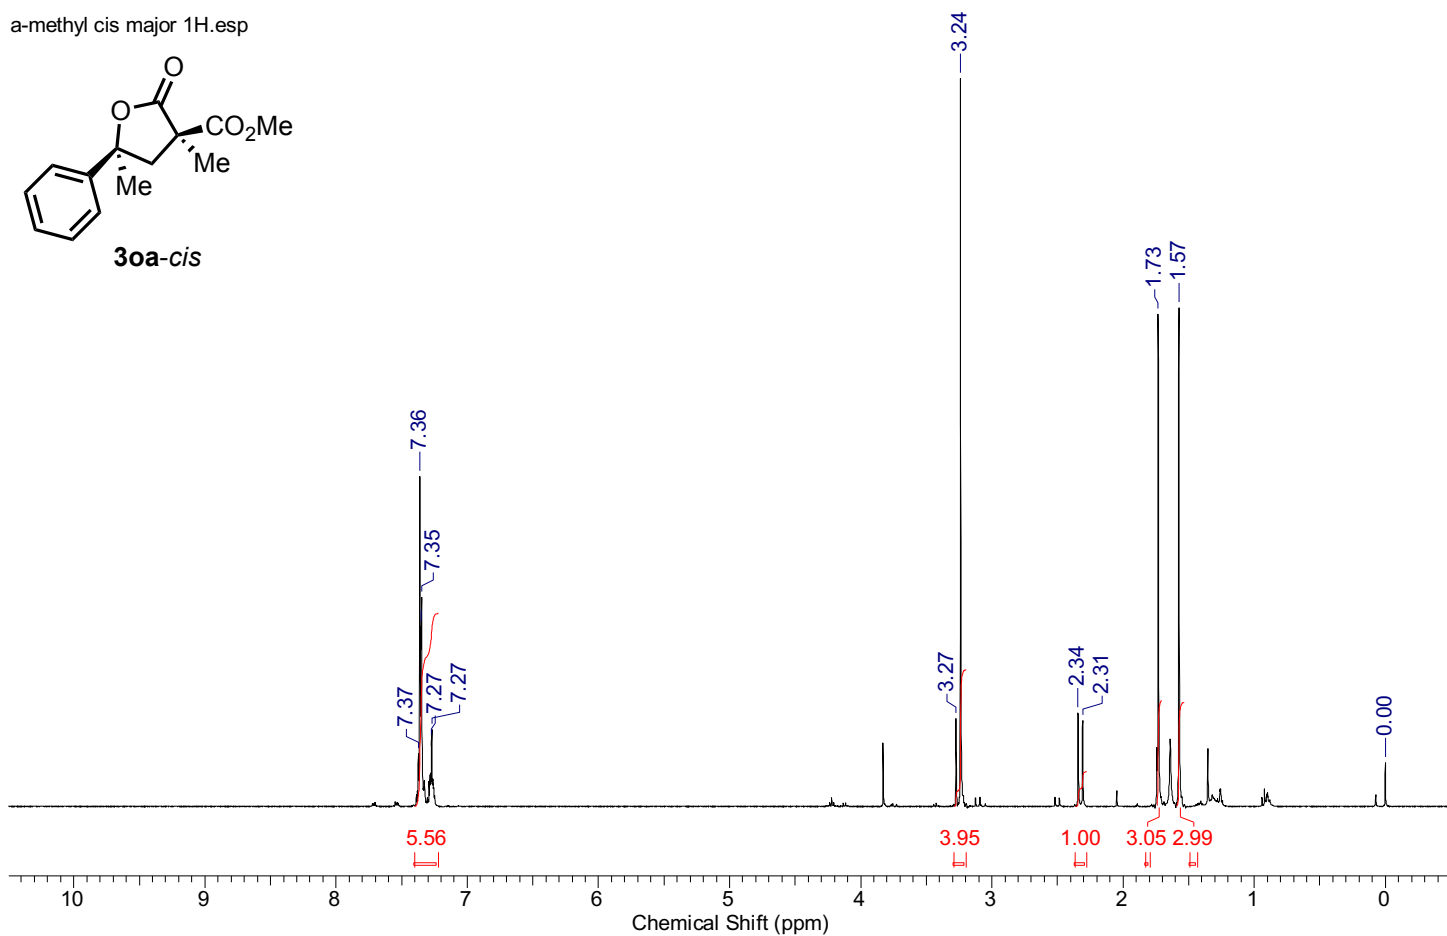

a-methyl cis major 13C.esp

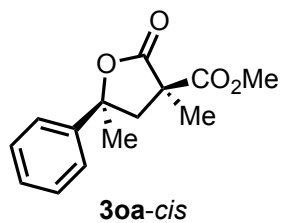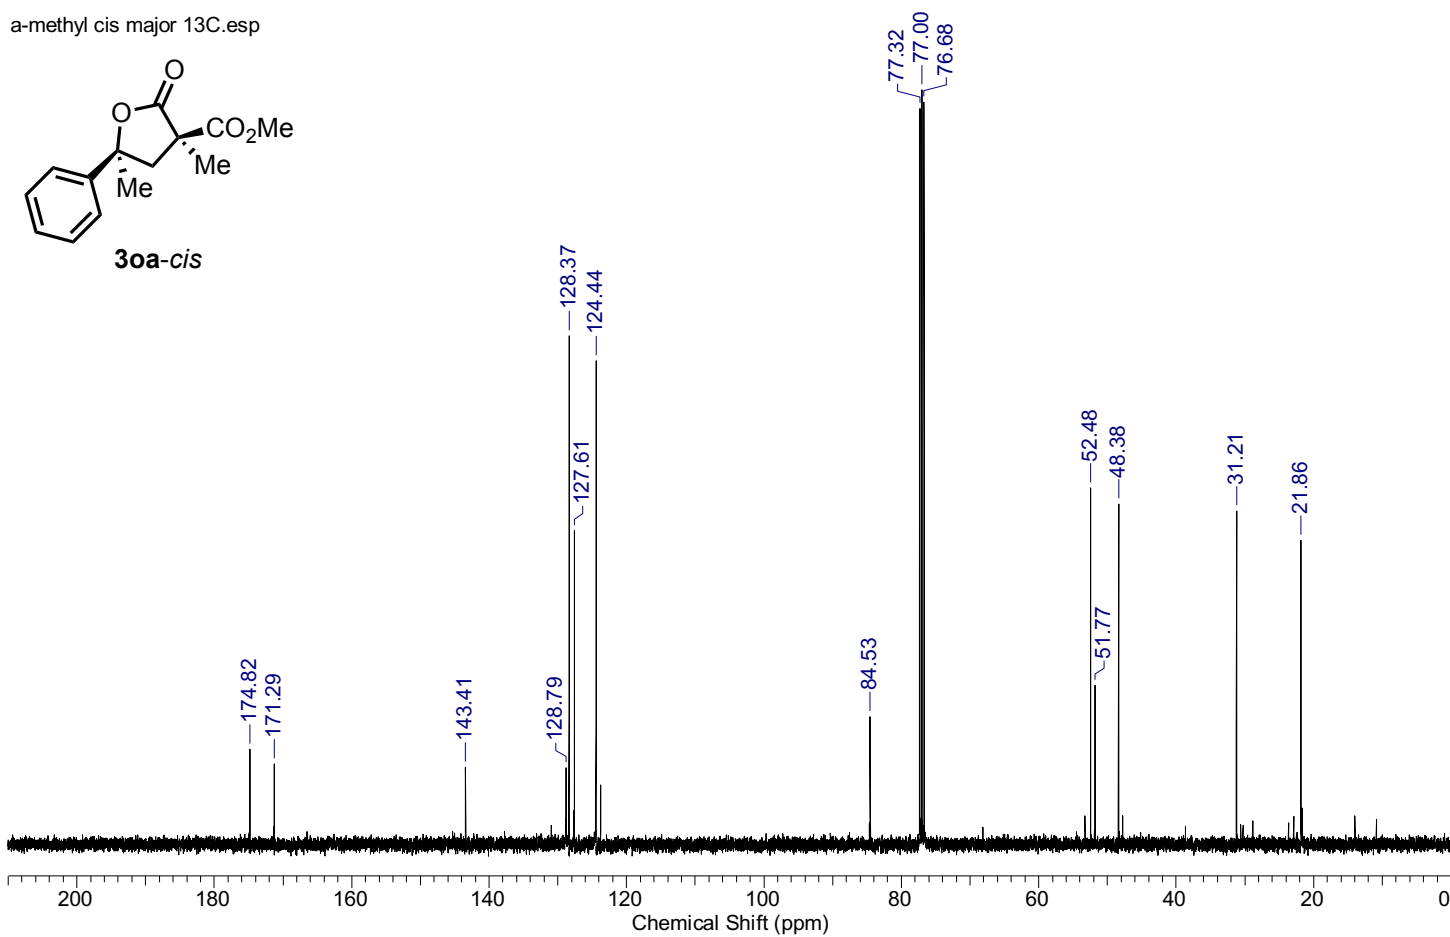

a-methyl trans major 1H.esp

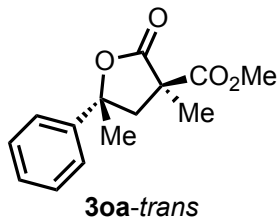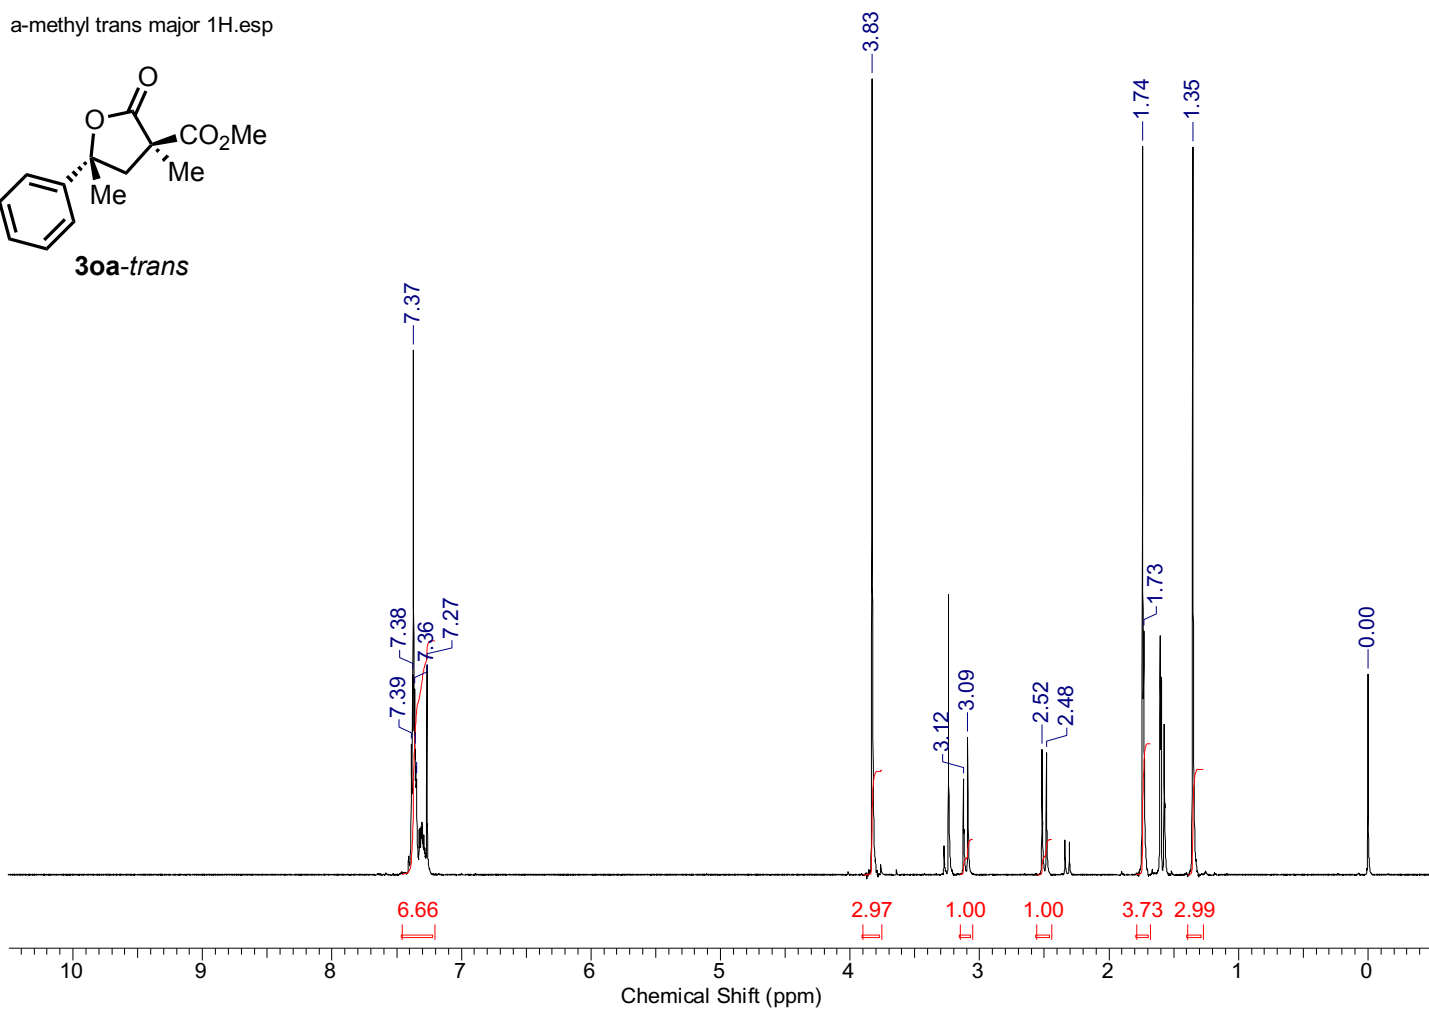

a-methyl trans major 13C.esp

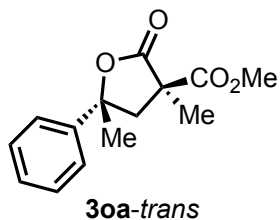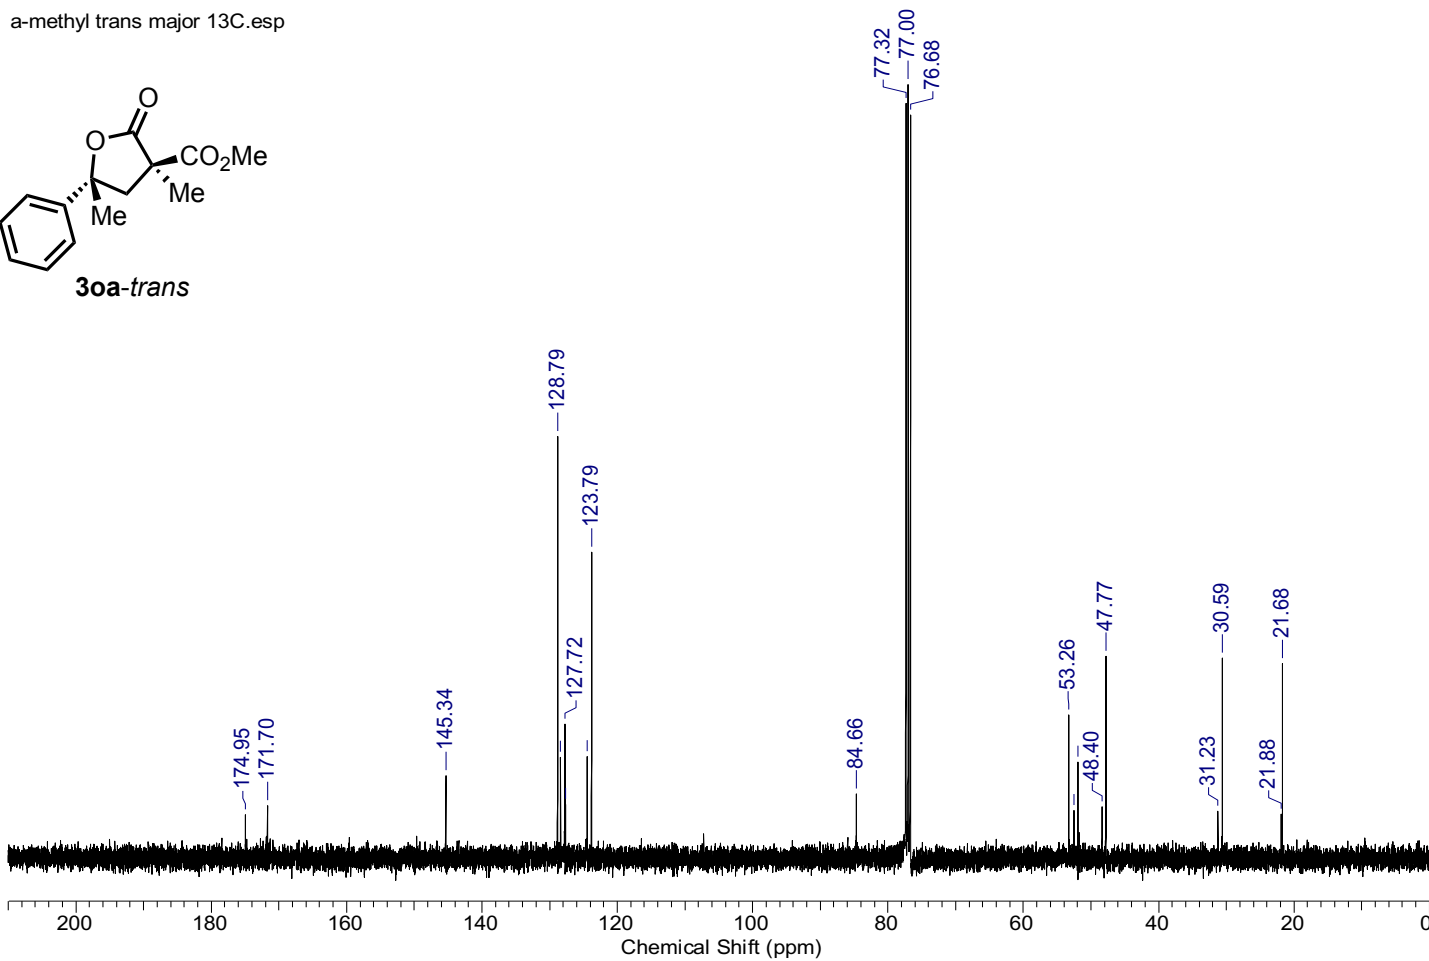

b-methyl cis 1H.esp

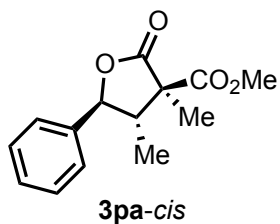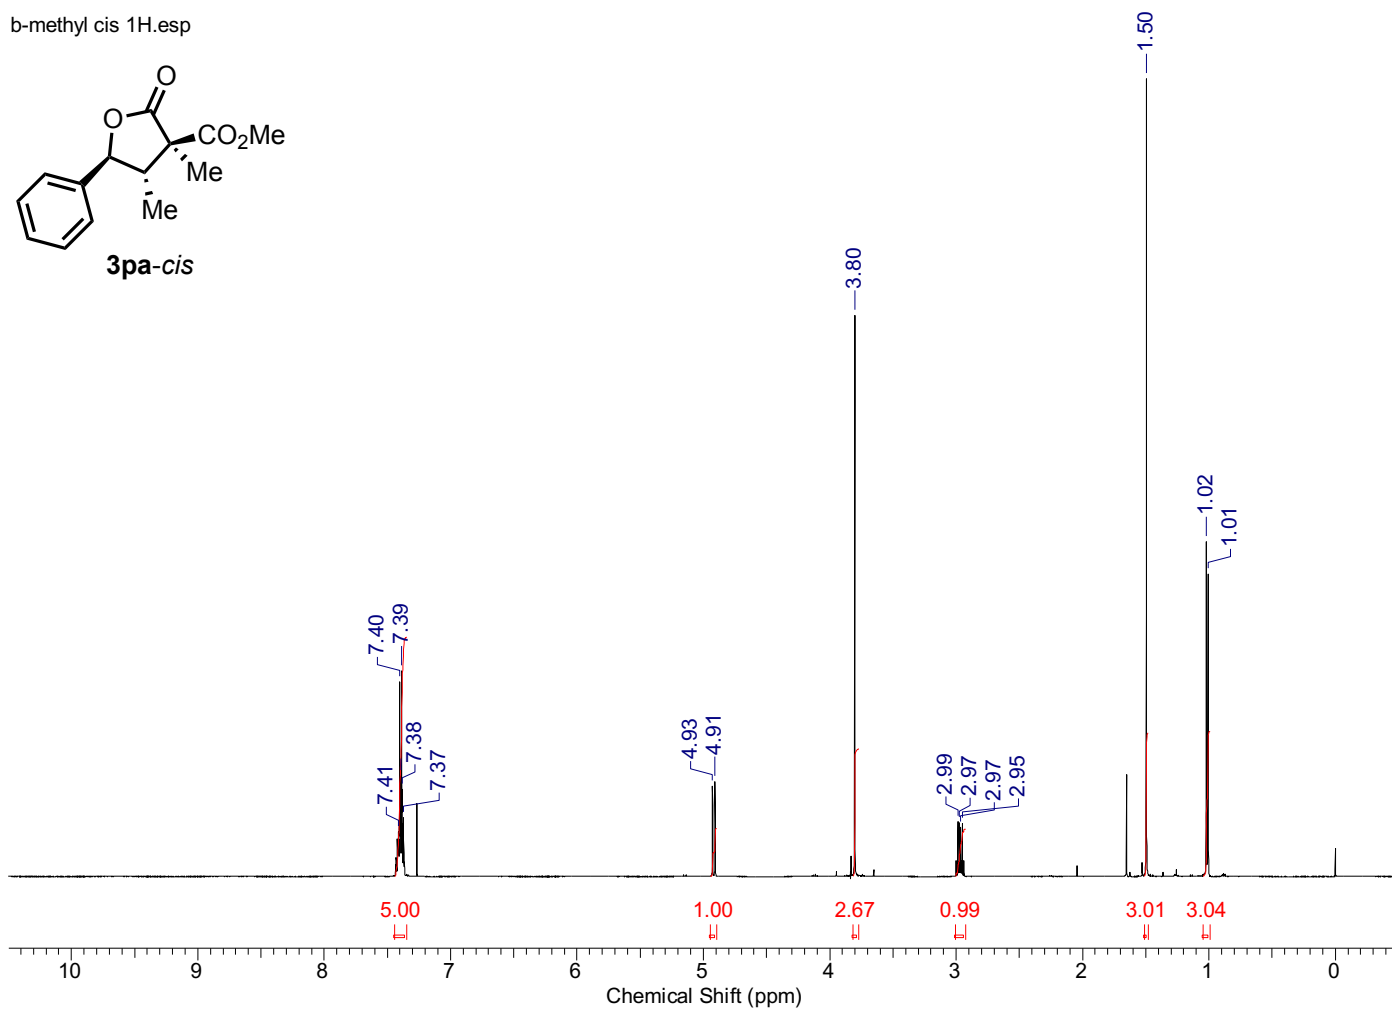

b-methyl cis 13C.esp

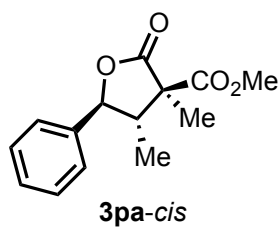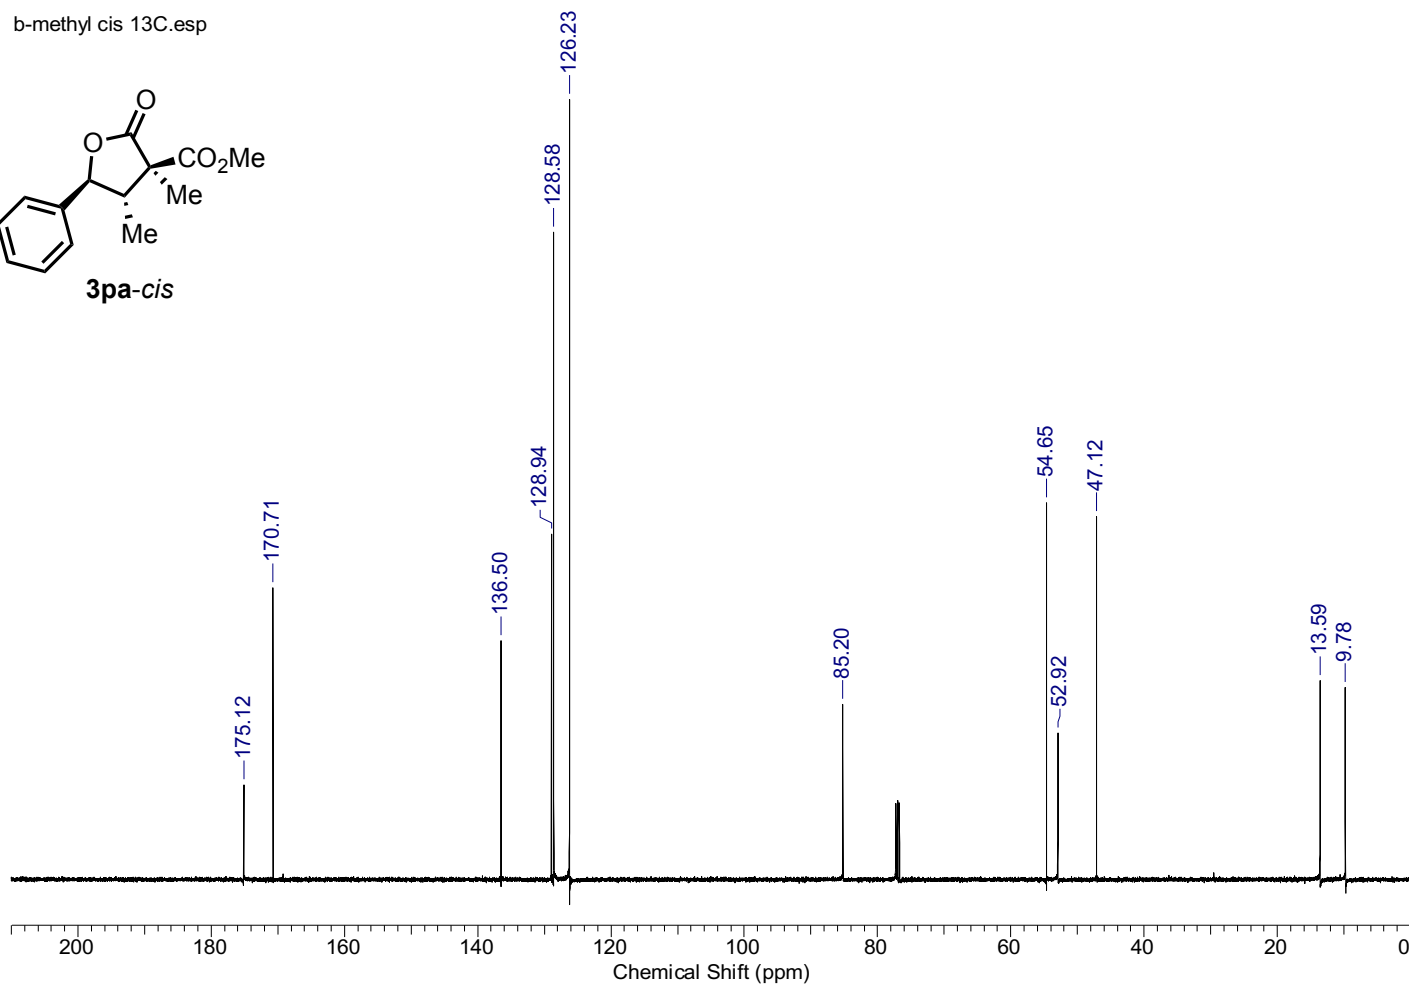

b-methyl trans 1H.esp

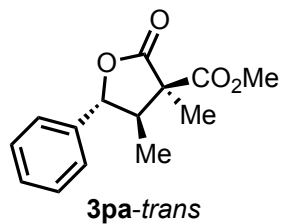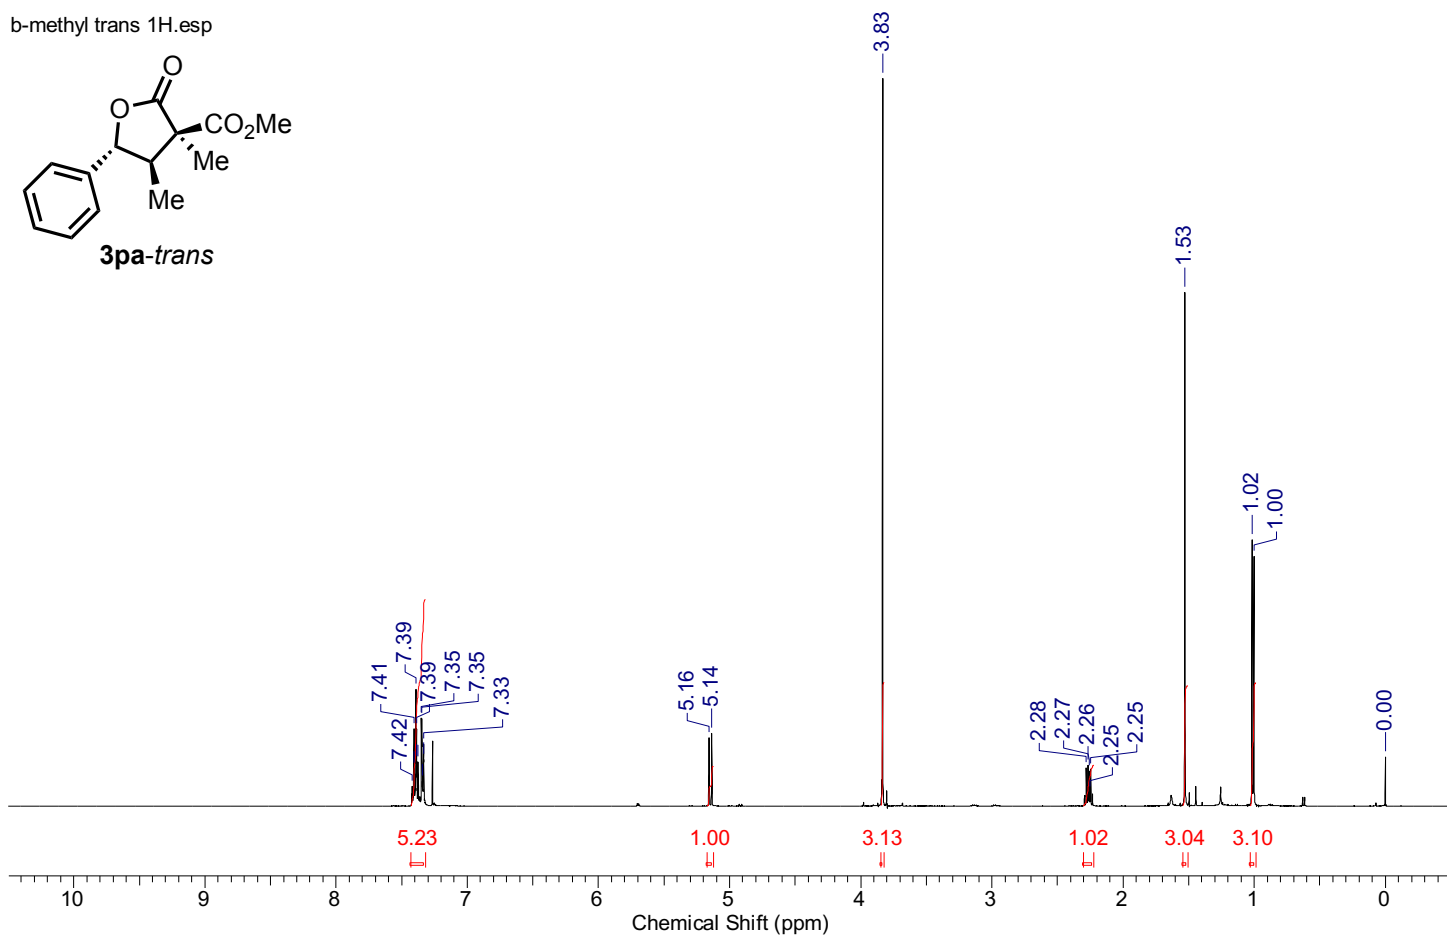

b-methyl trans 13C.esp

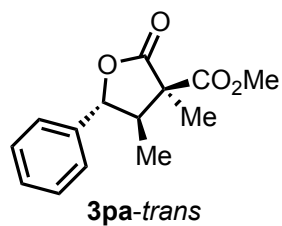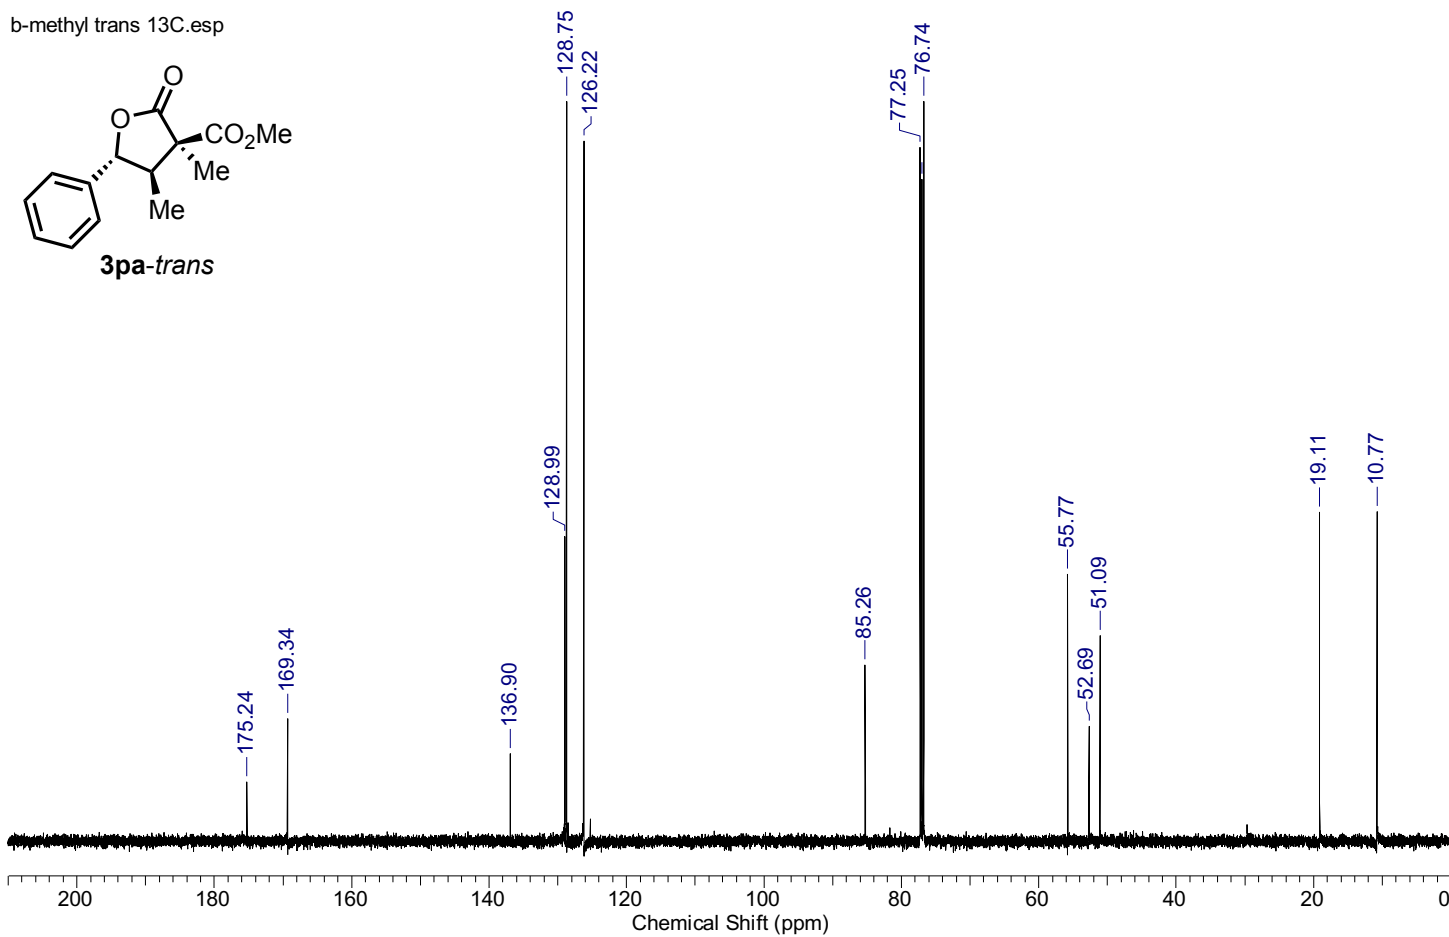

Indene 1H.esp

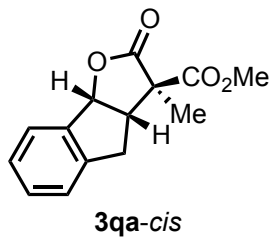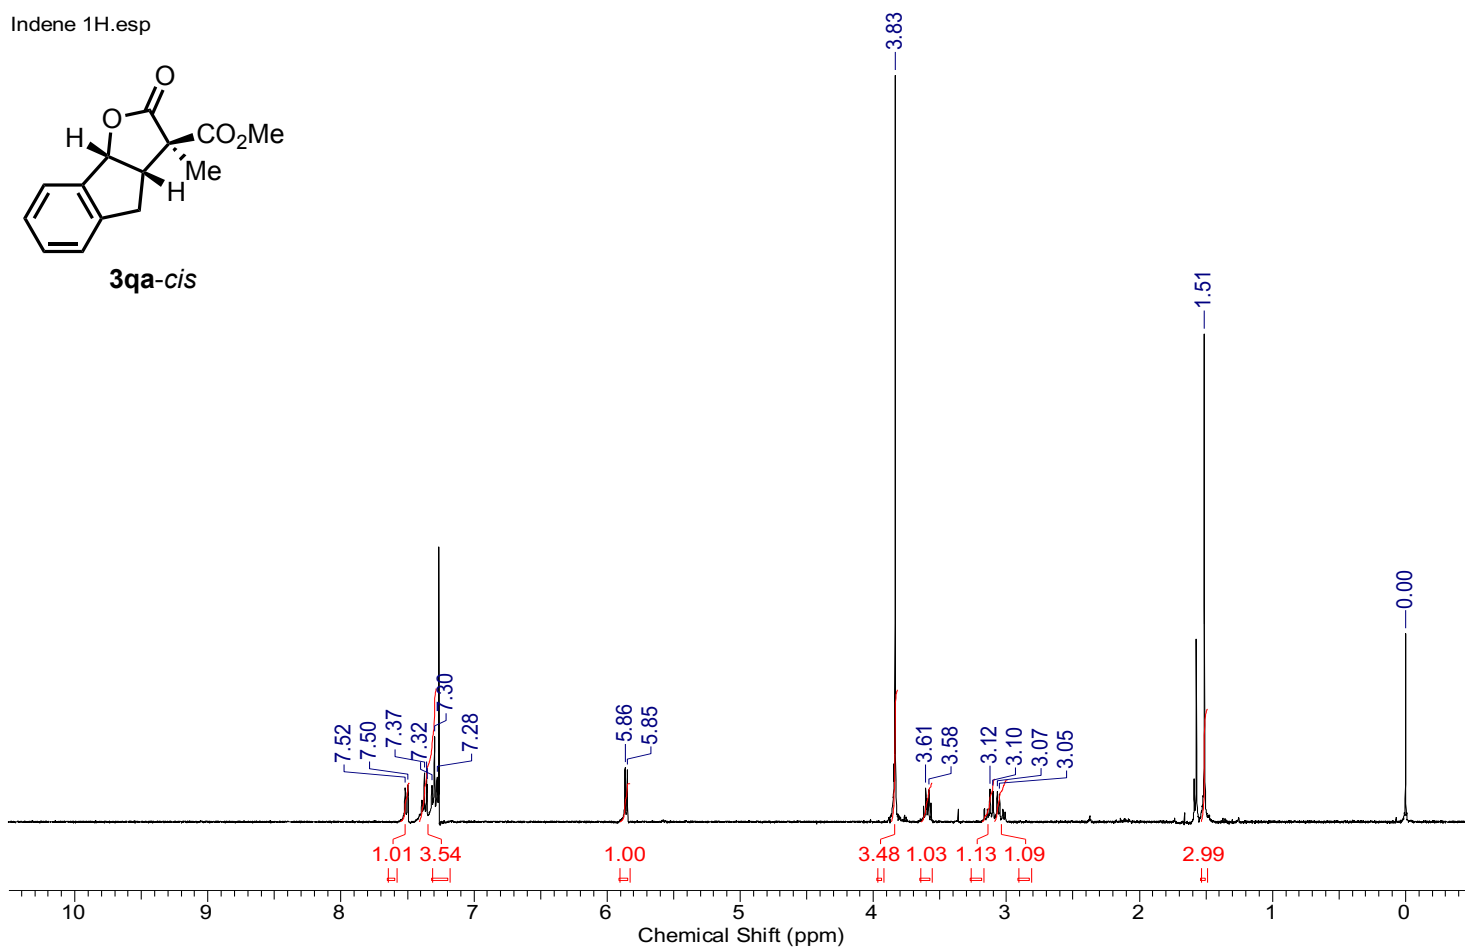

Indene 13C.esp

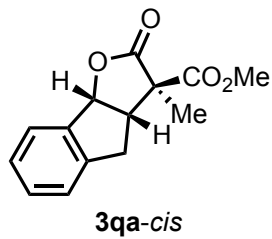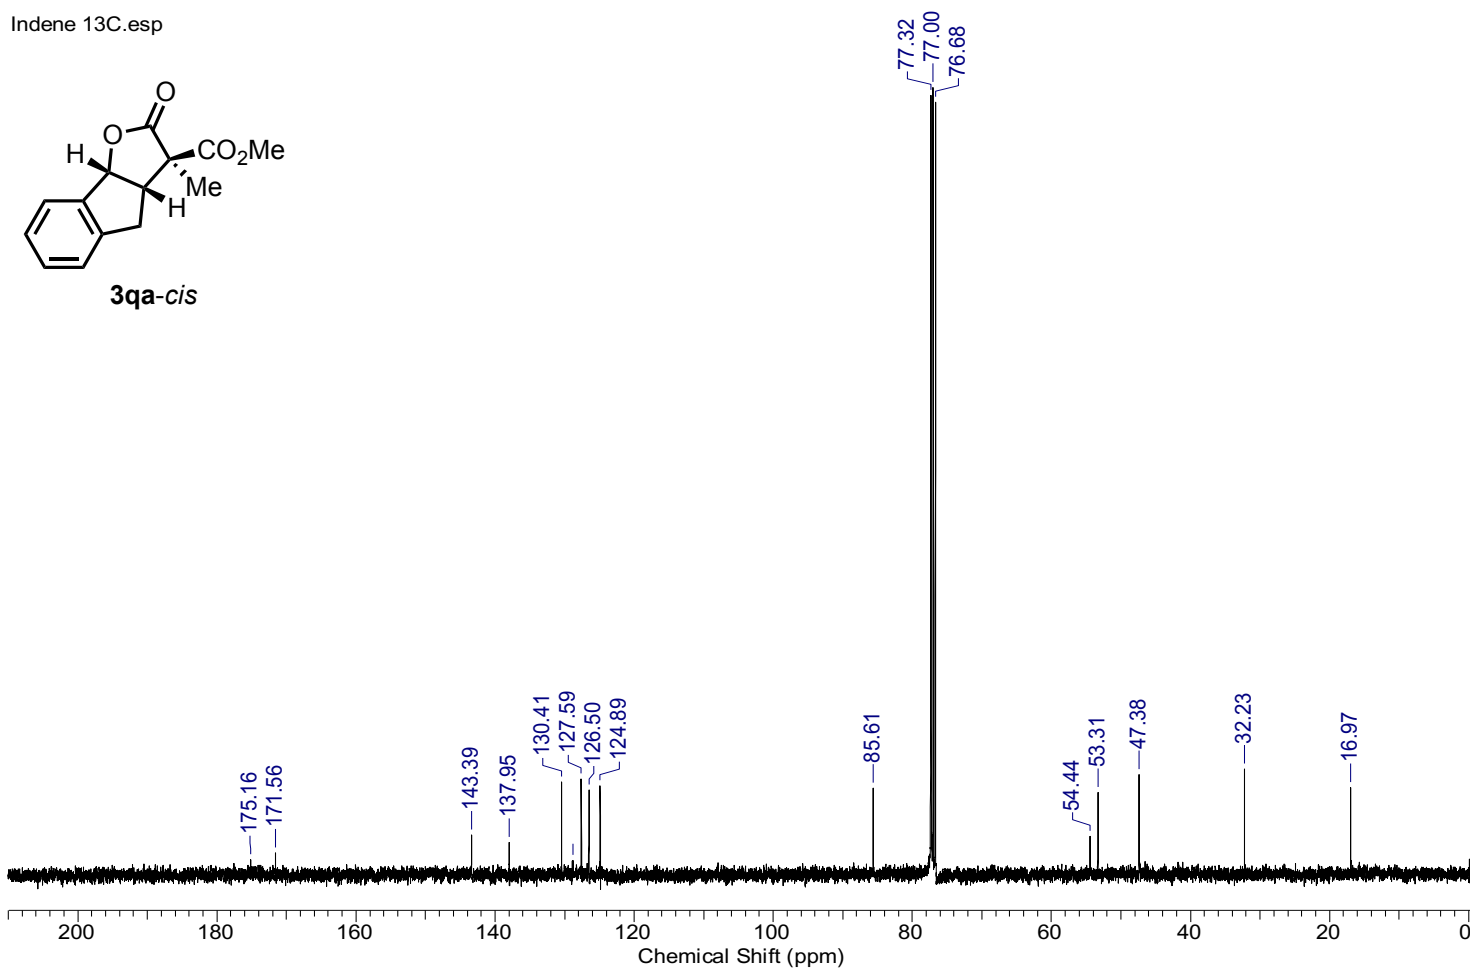

1,1-diphenylstyrene 1H.esp

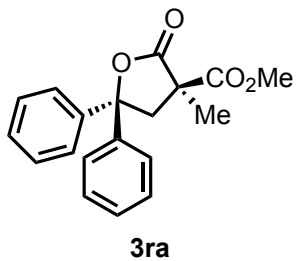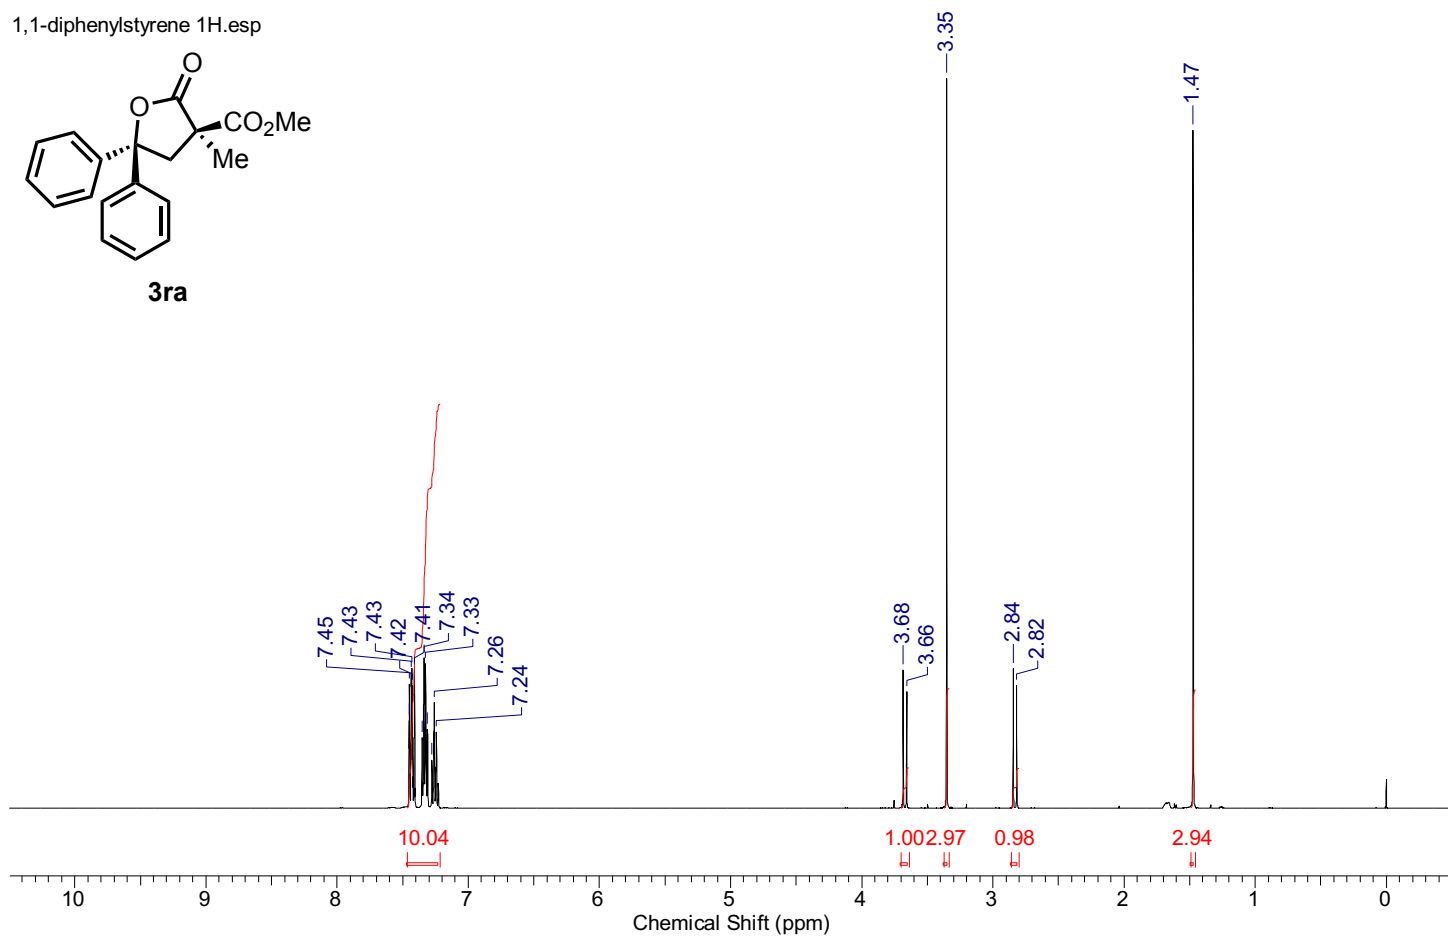

1,1-diphenylstyrene 13C.esp

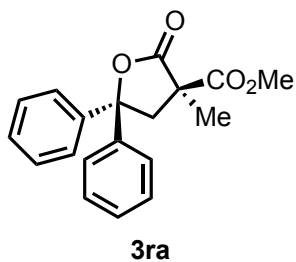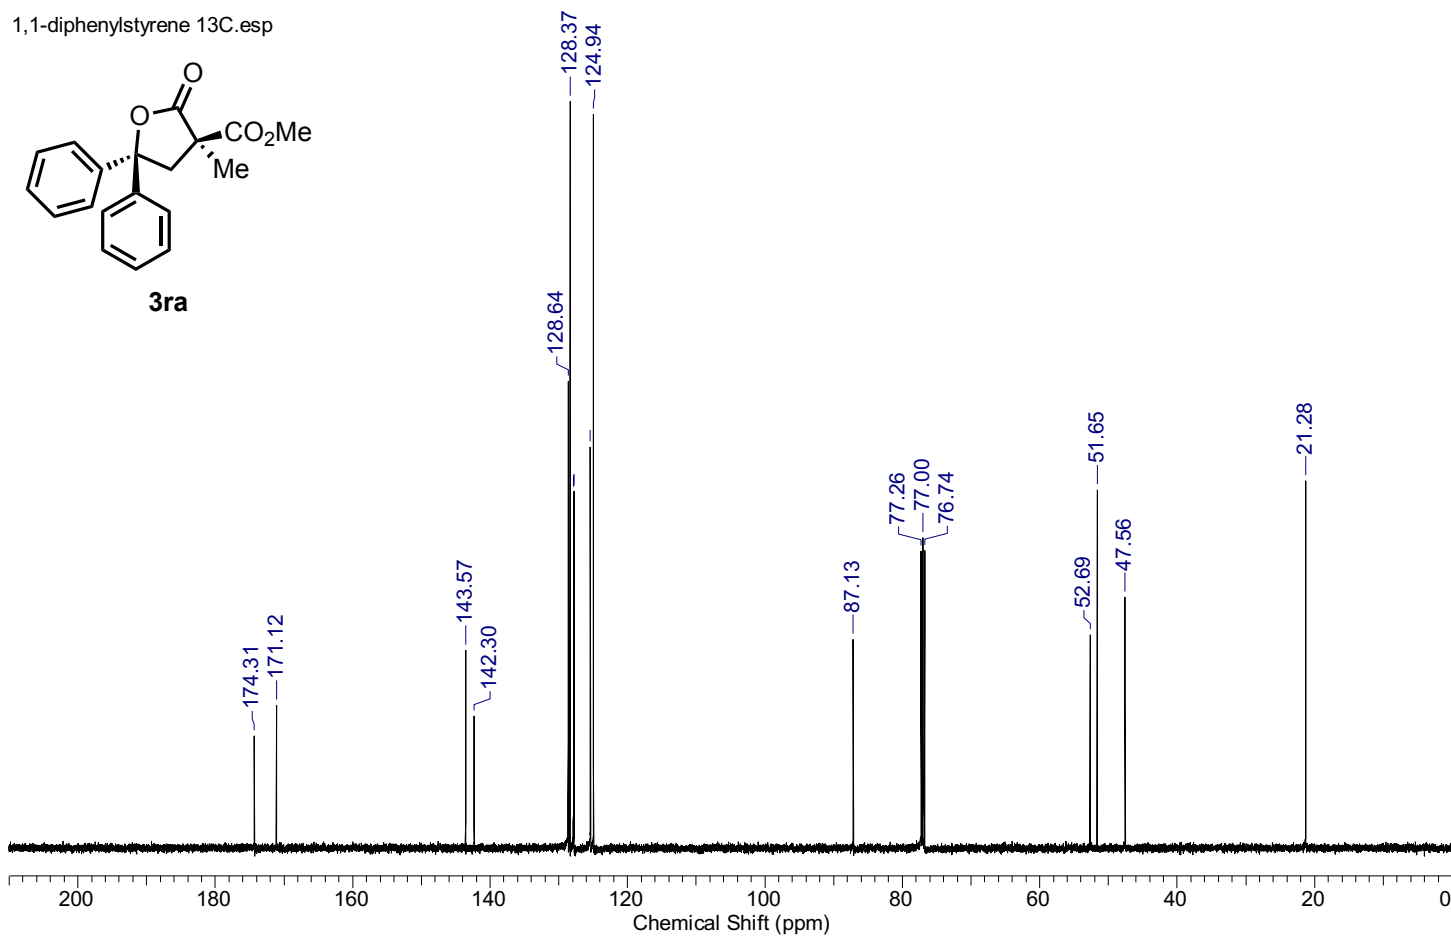

stilbene 3-A1H.esp

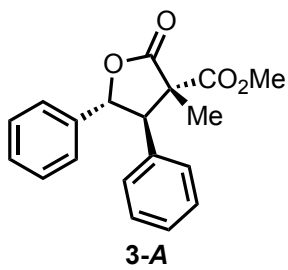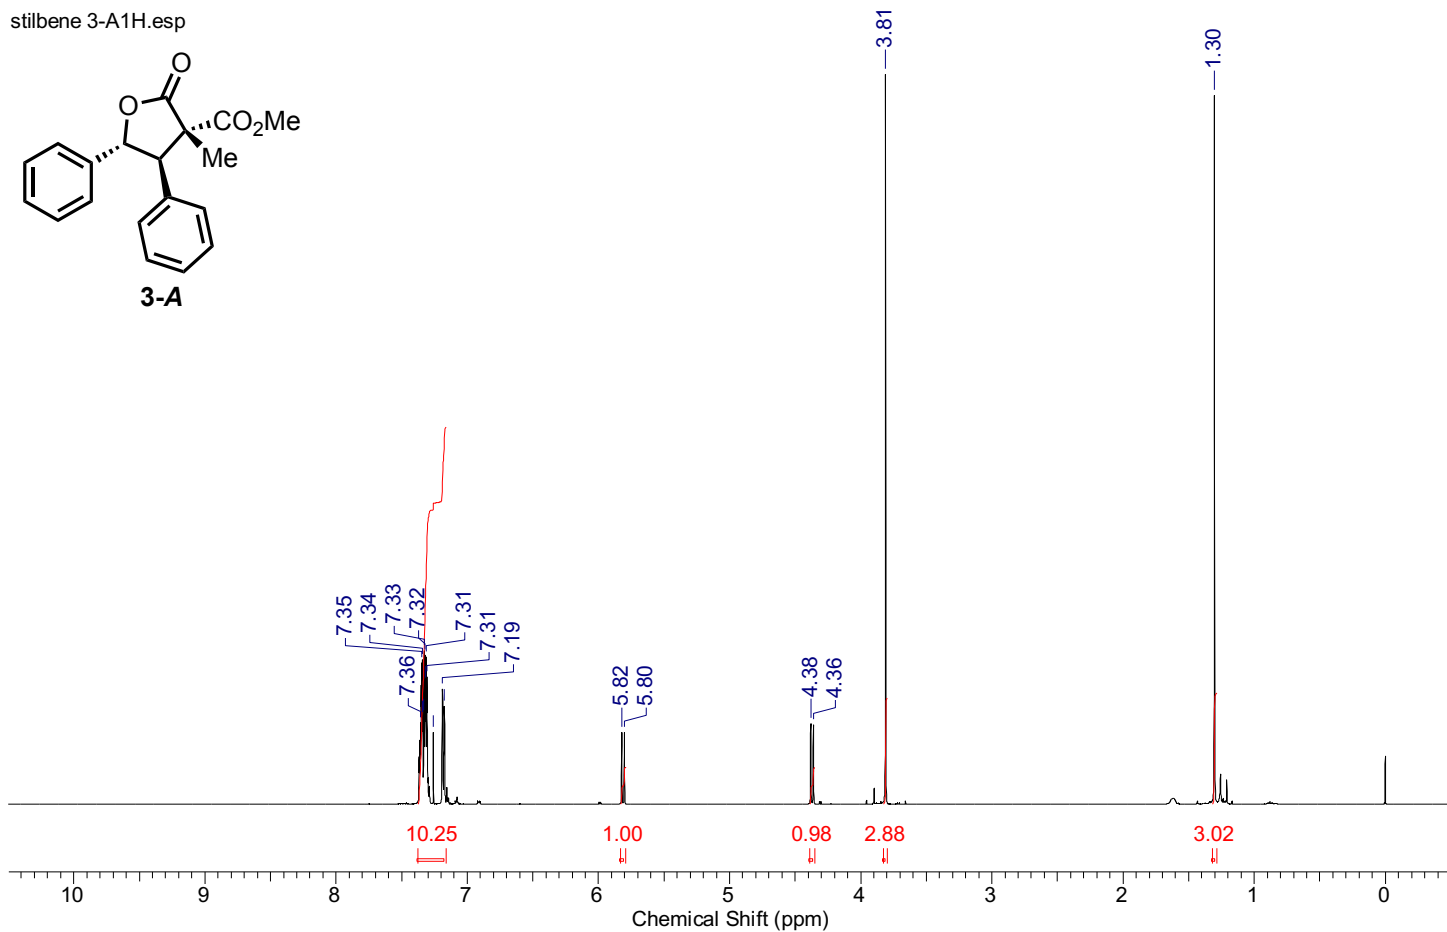

stilbene 3-A13C.esp

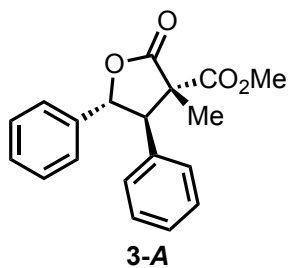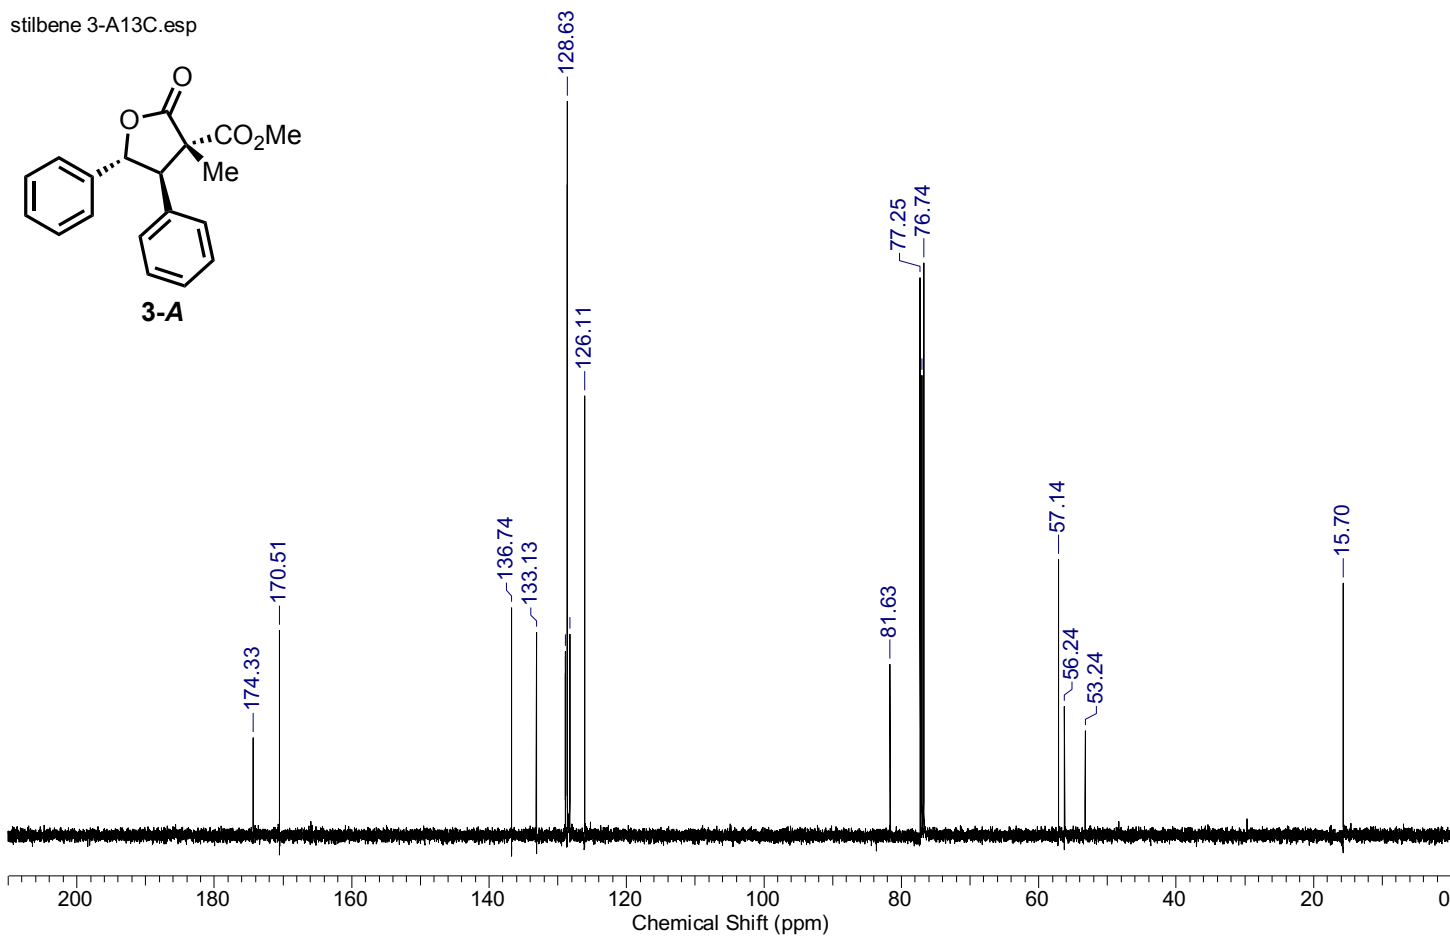

stilbene 3-B 1H.esp

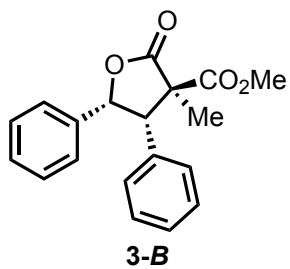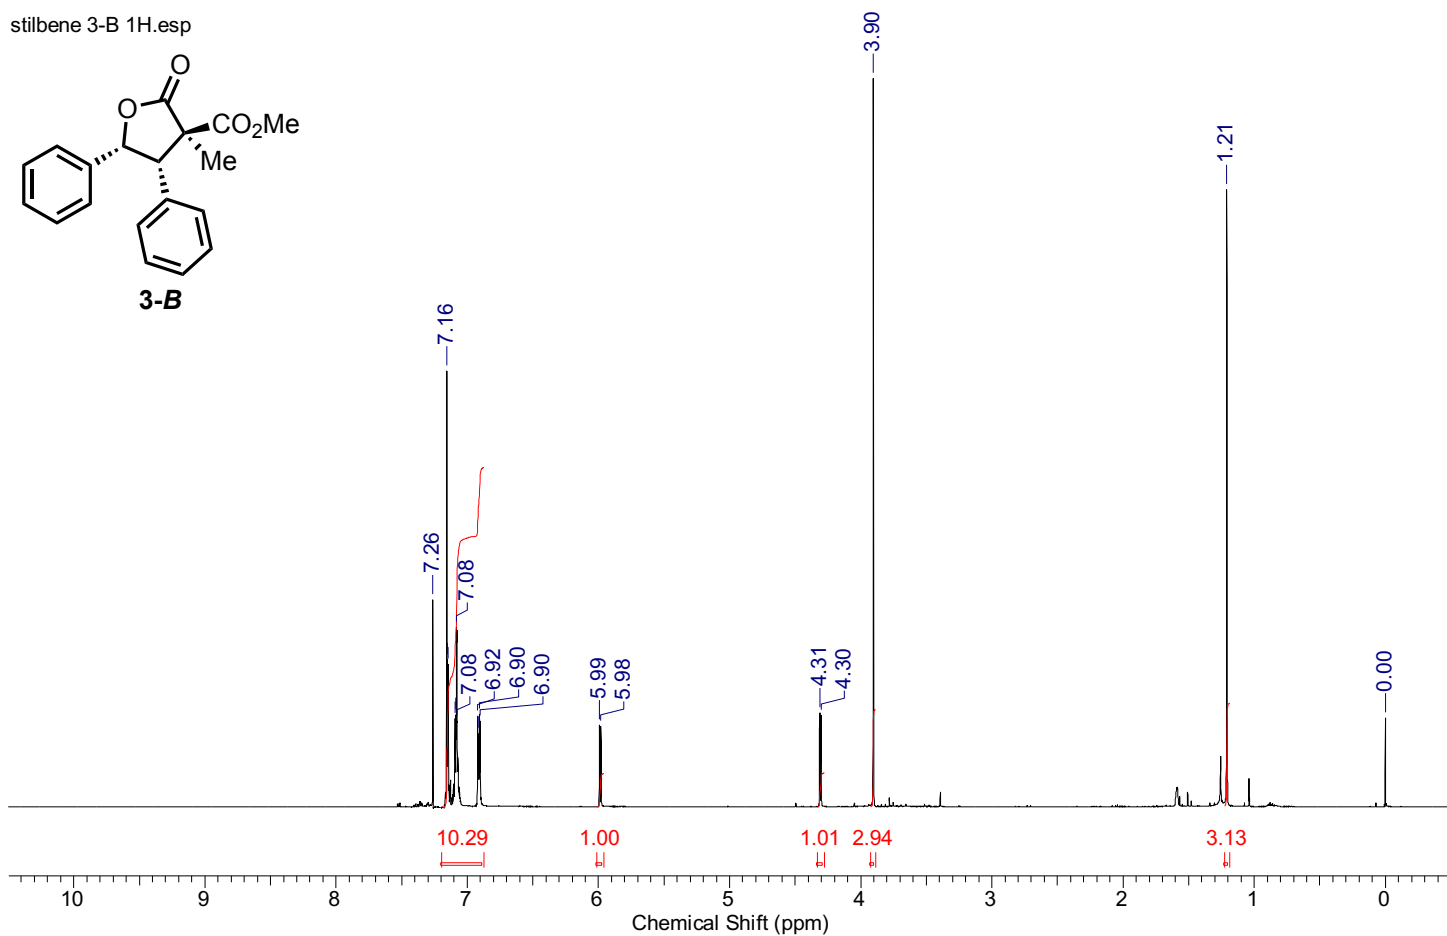

stilbene 3-B 13C.esp

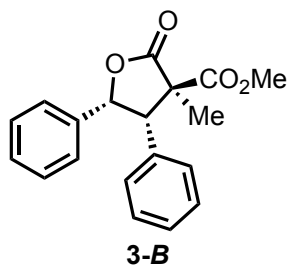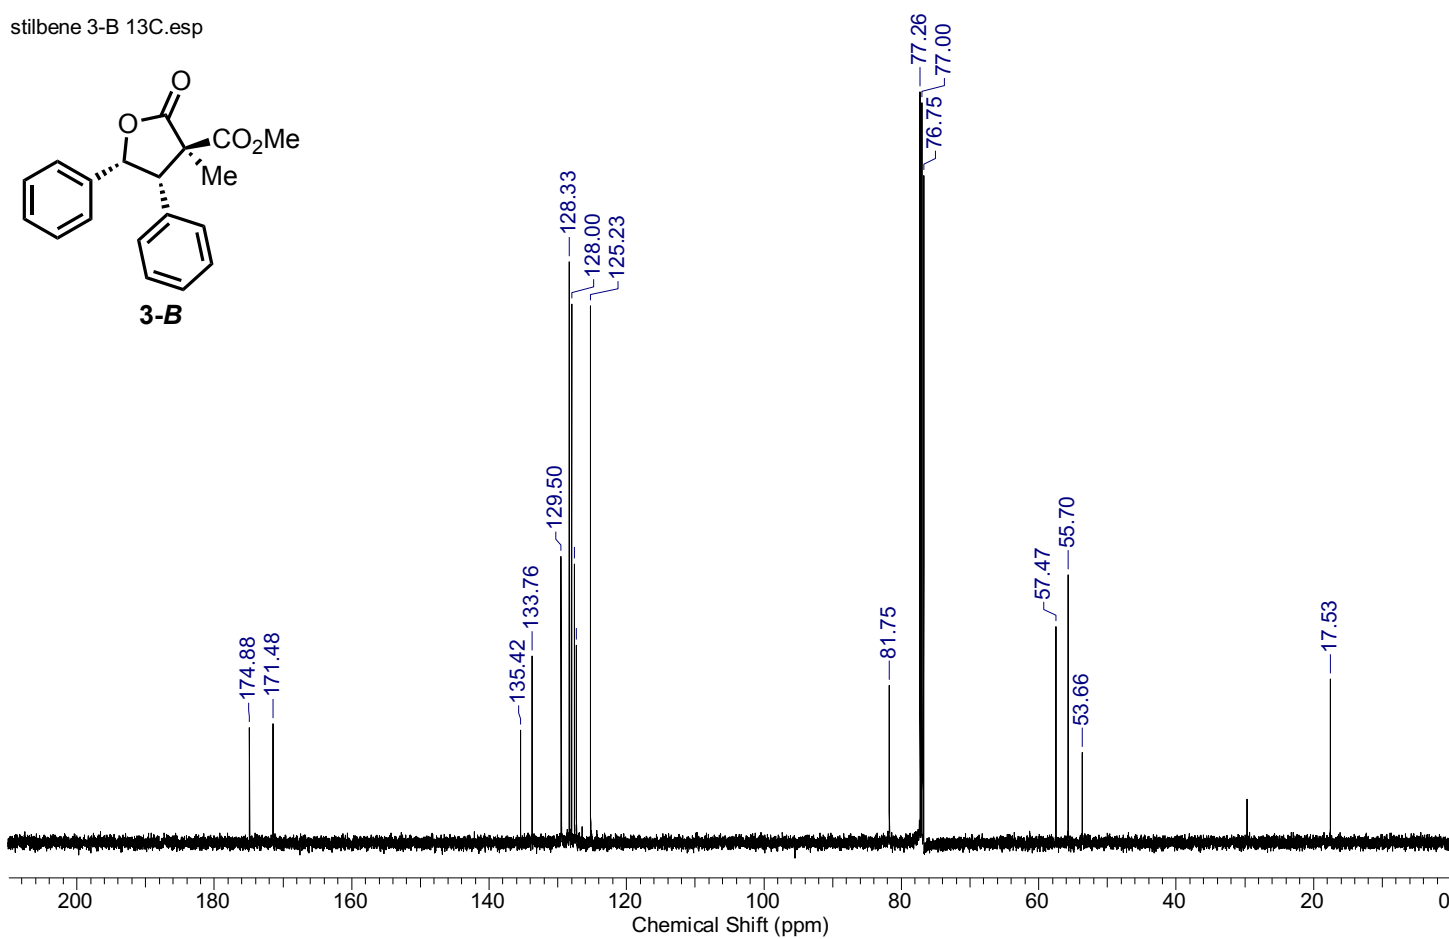



stilbene 3-C 1H.esp

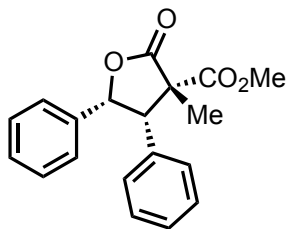

3-C

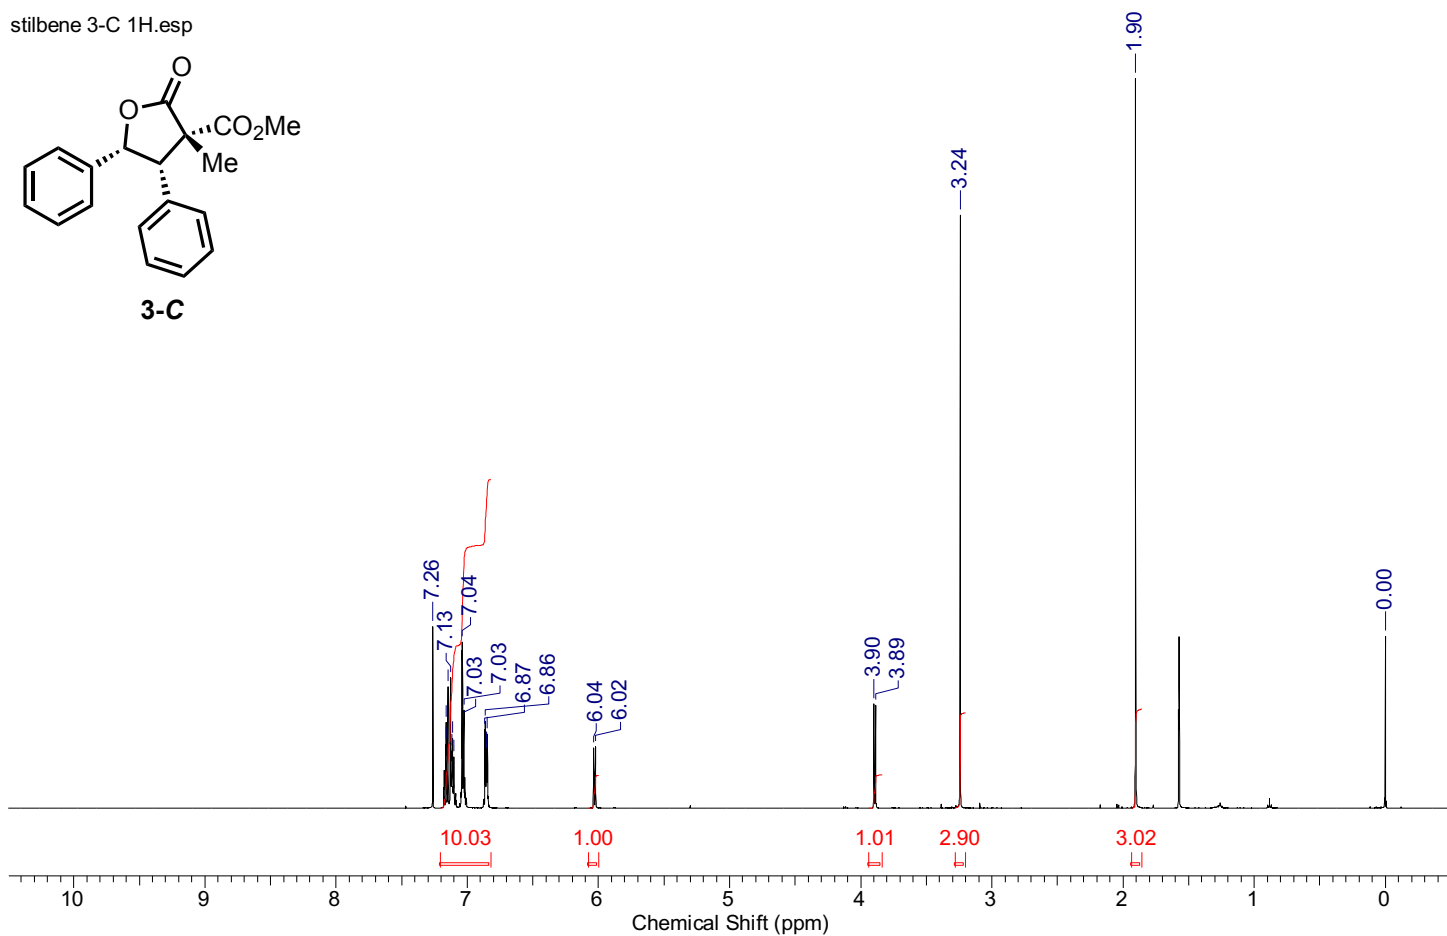

stilbene 3-C 13C.esp

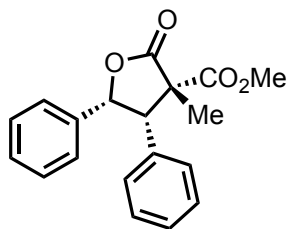

3-C

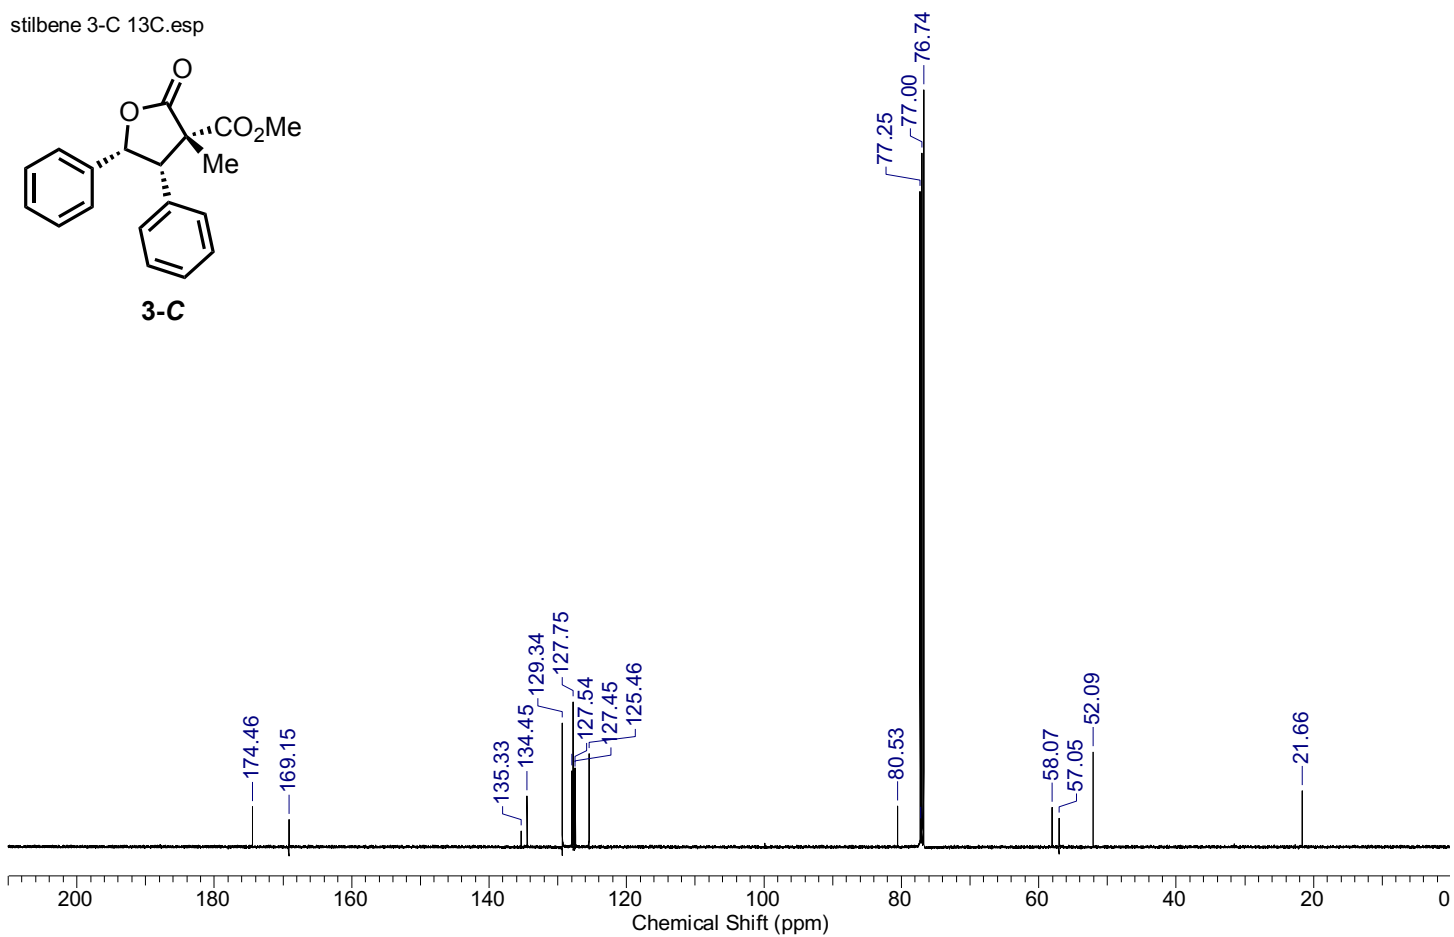

stilbene 3-D 1H.esp

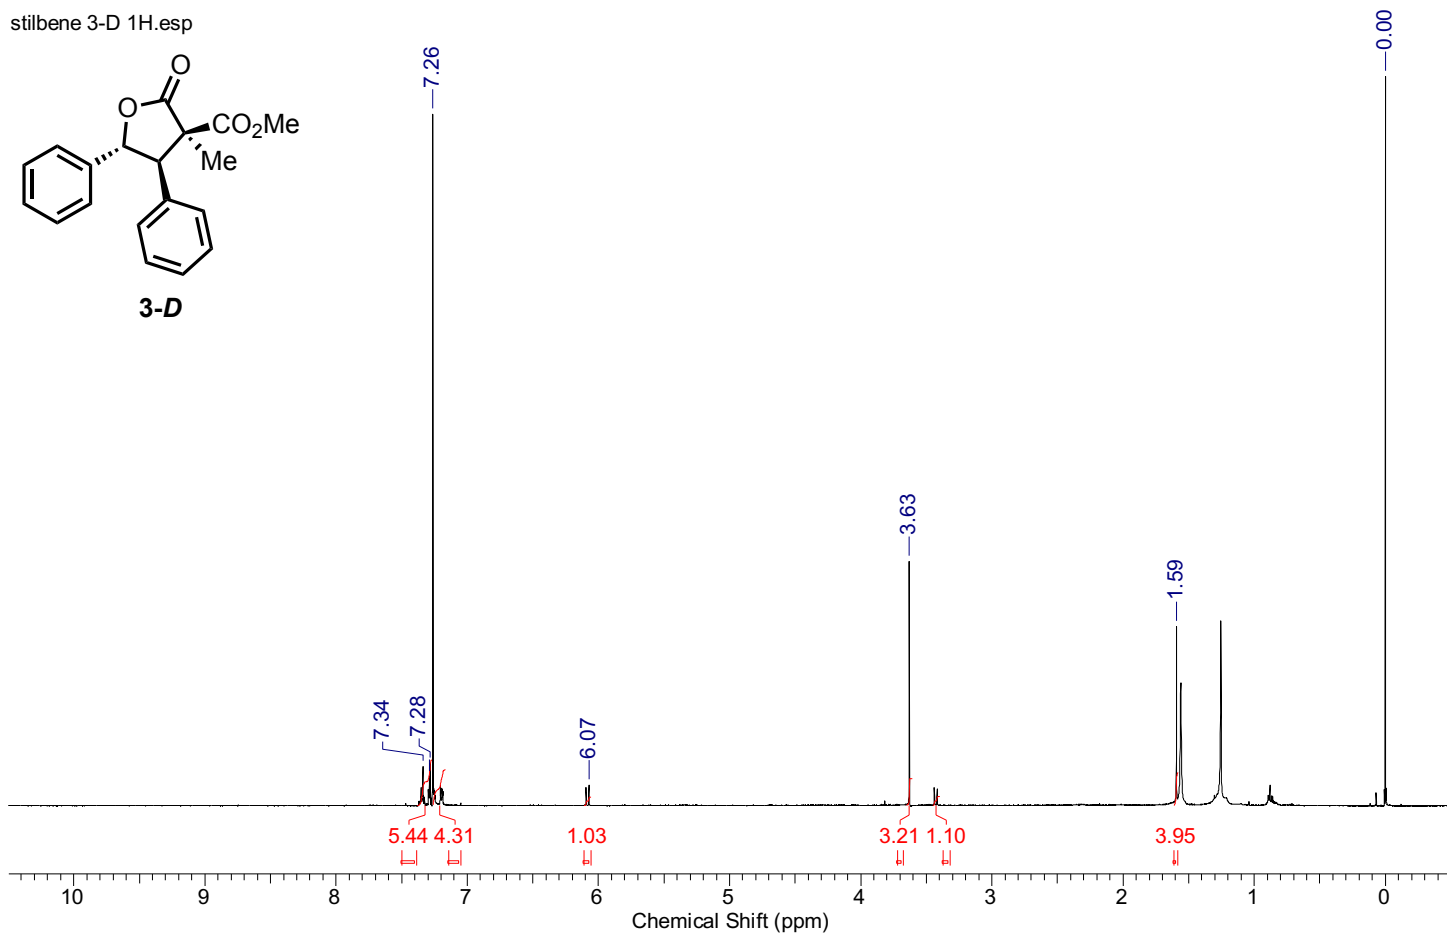

stilbene 3-D 13C.esp

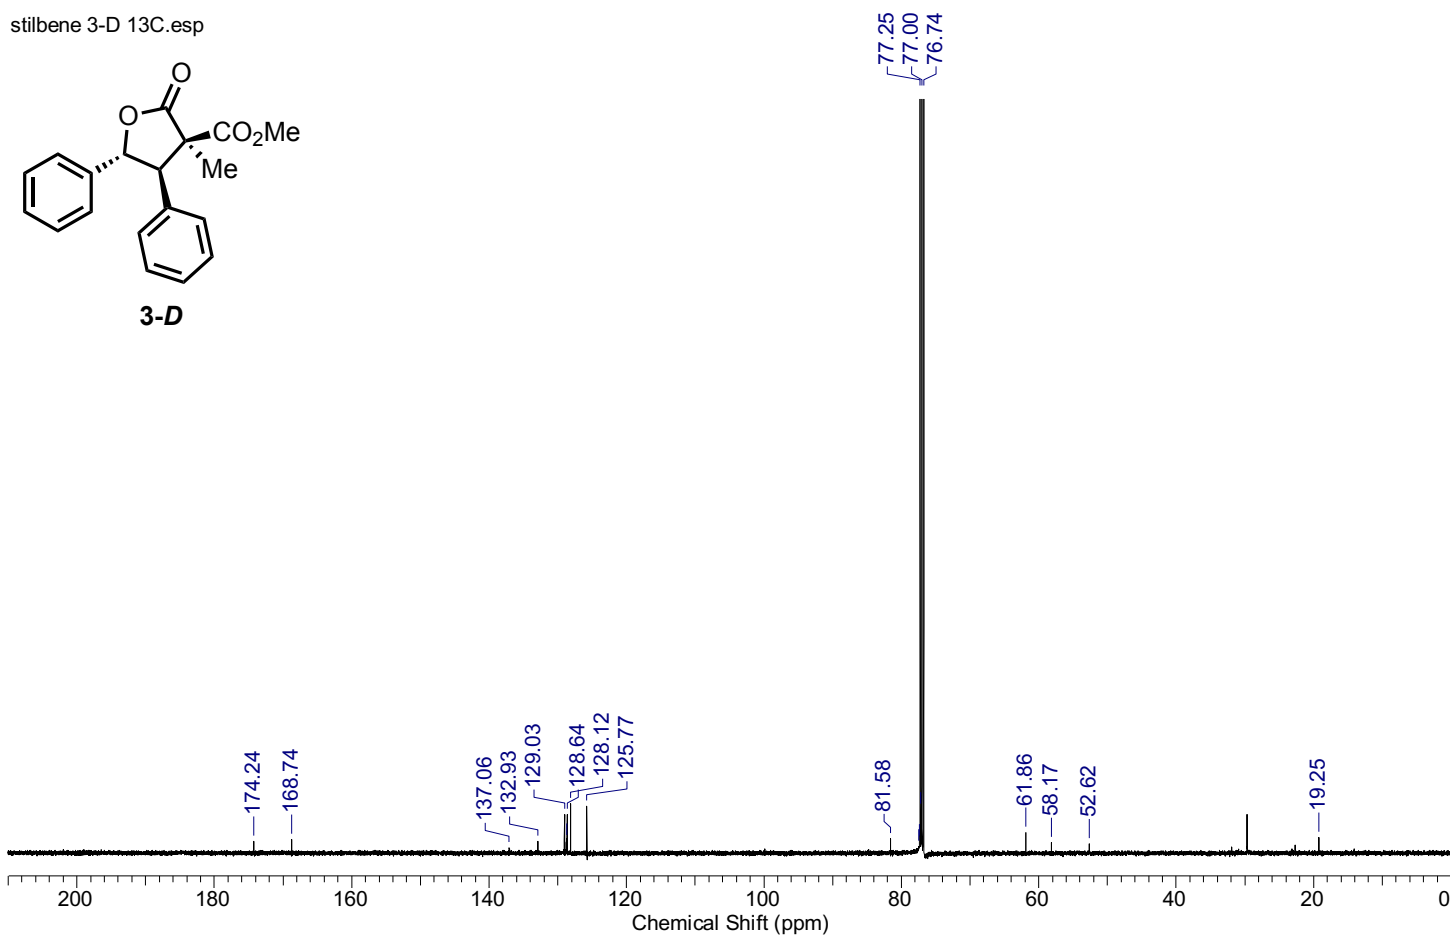

### Figure S4. Key NOE of 3pa-cis

b-methyl cis 1H.esp

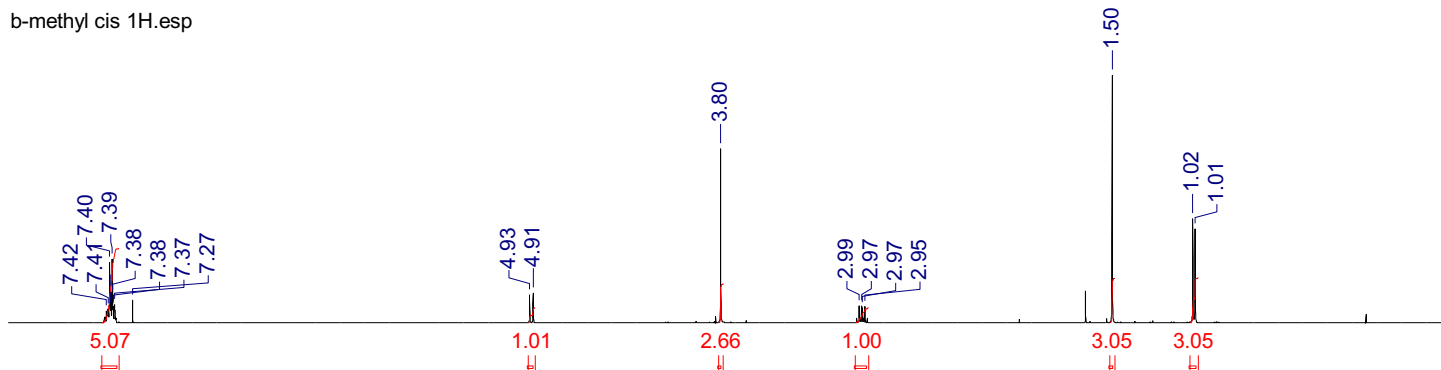

3pa-cis 1.50ppm\_Me.esp

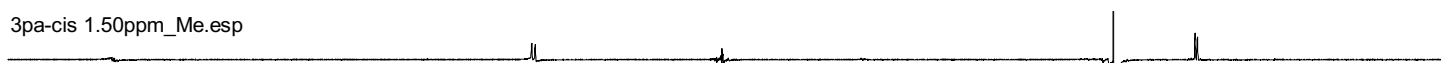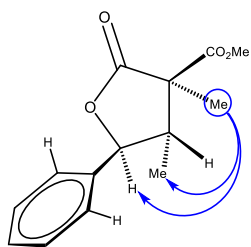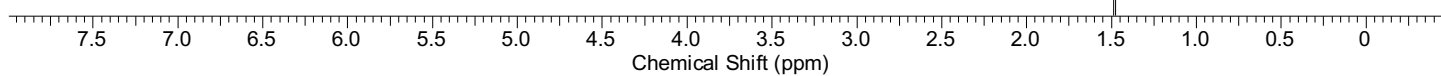

b-methyl cis 1H.esp

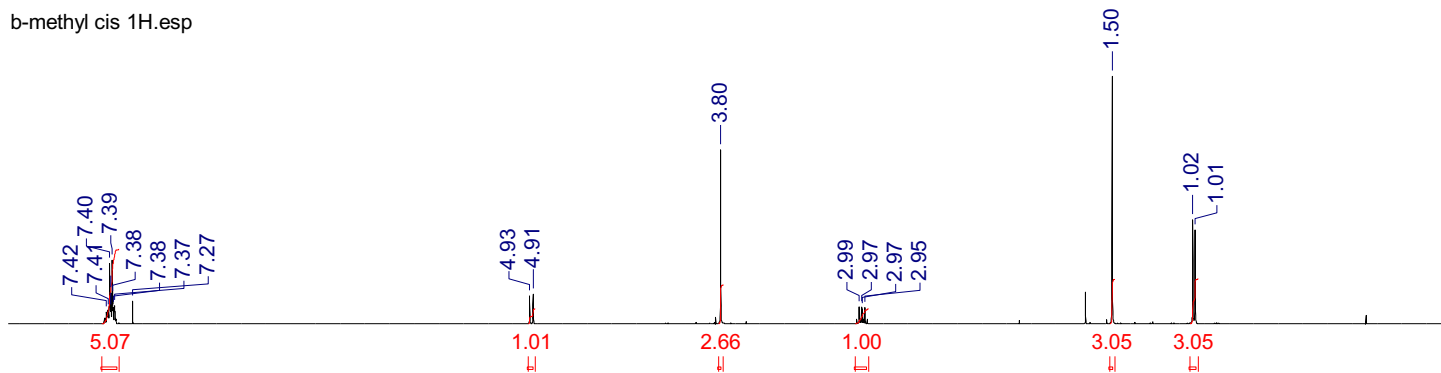

3pa-cis 2.96ppm\_1H.esp

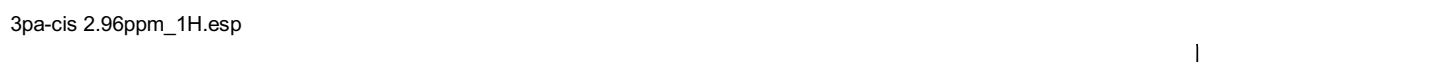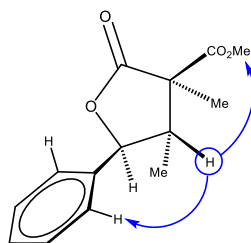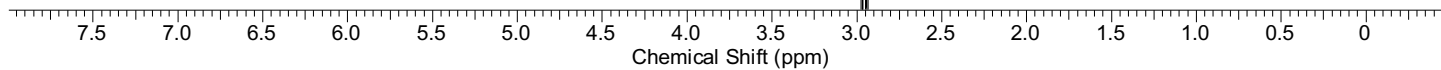

### Figure S5. Key NOE of 3pa-trans

b-methyl trans 1H.esp

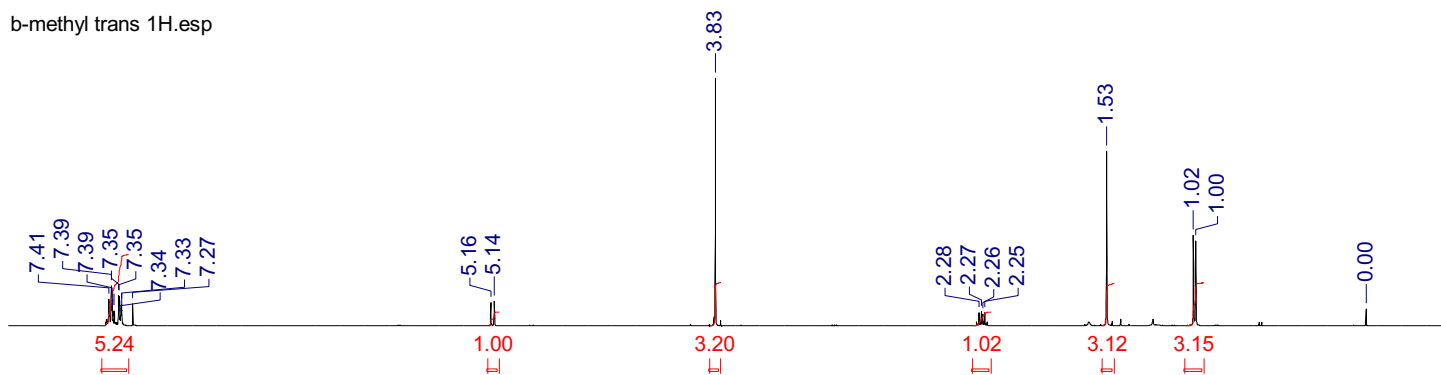

3pa-trans 1.01ppm\_Me.esp

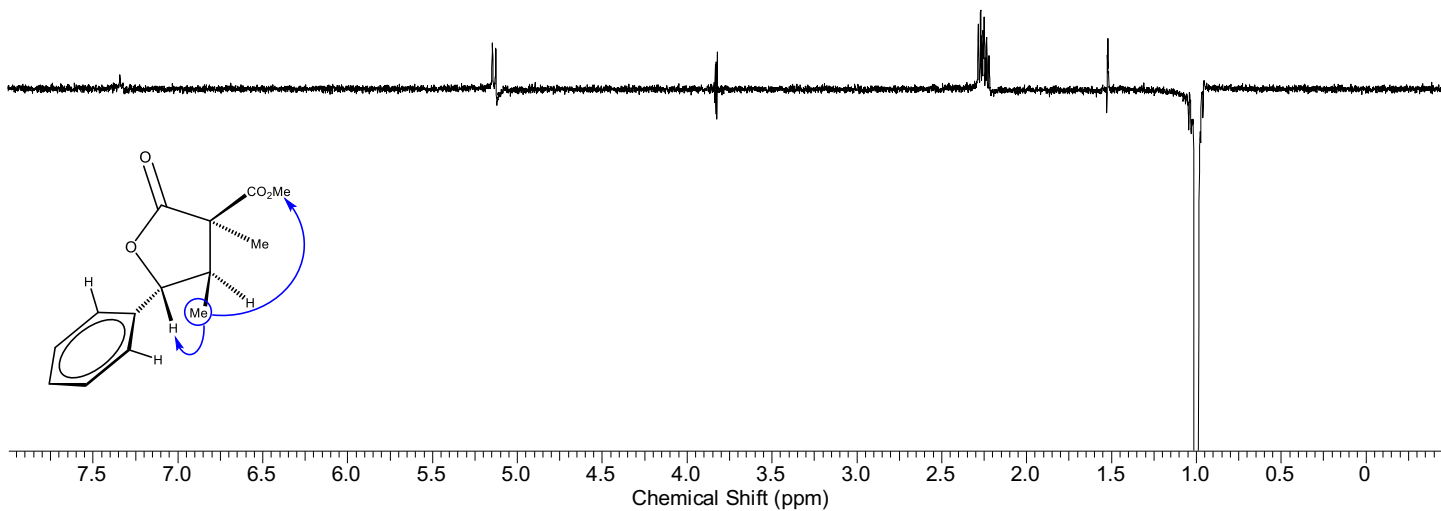

b-methyl trans 1H.esp

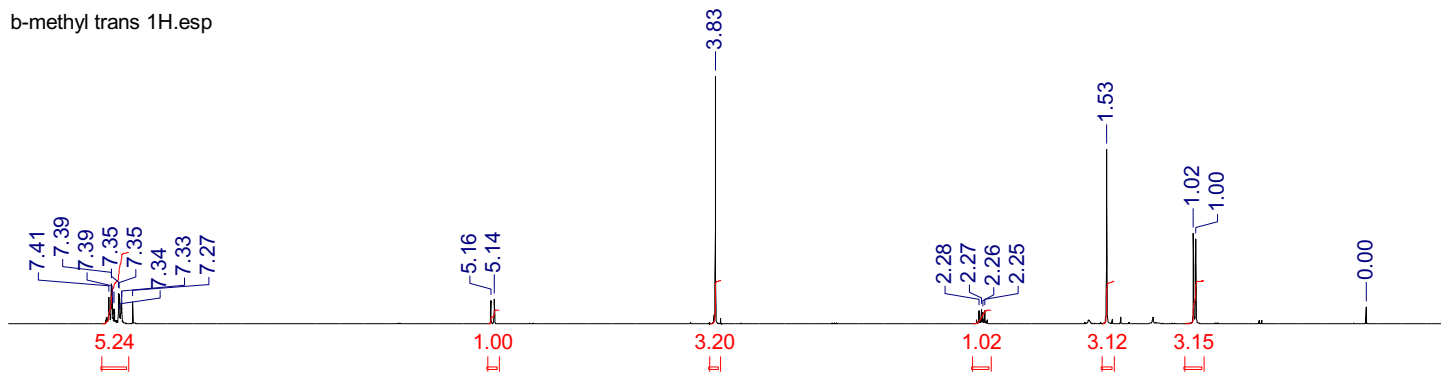

3pa-trans 1.53ppm\_Me.esp

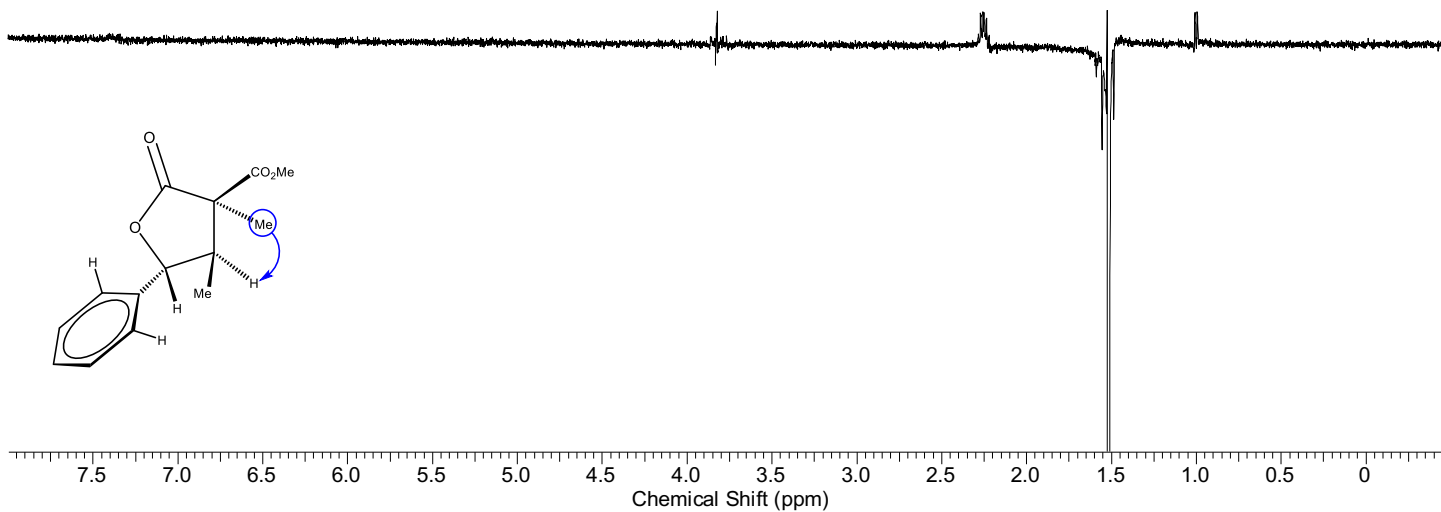

b-methyl trans 1H.esp

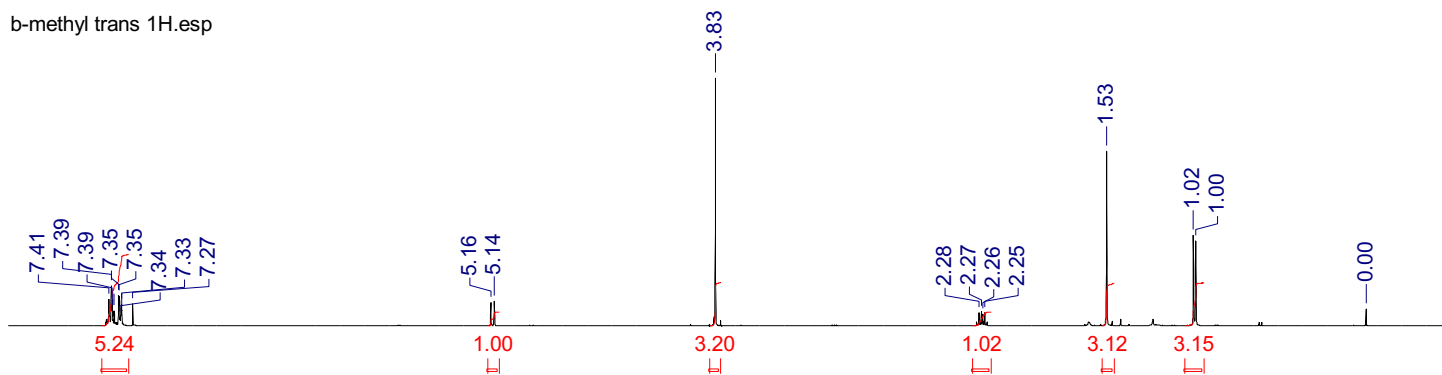

3pa-trans 5.15ppm\_1H.esp

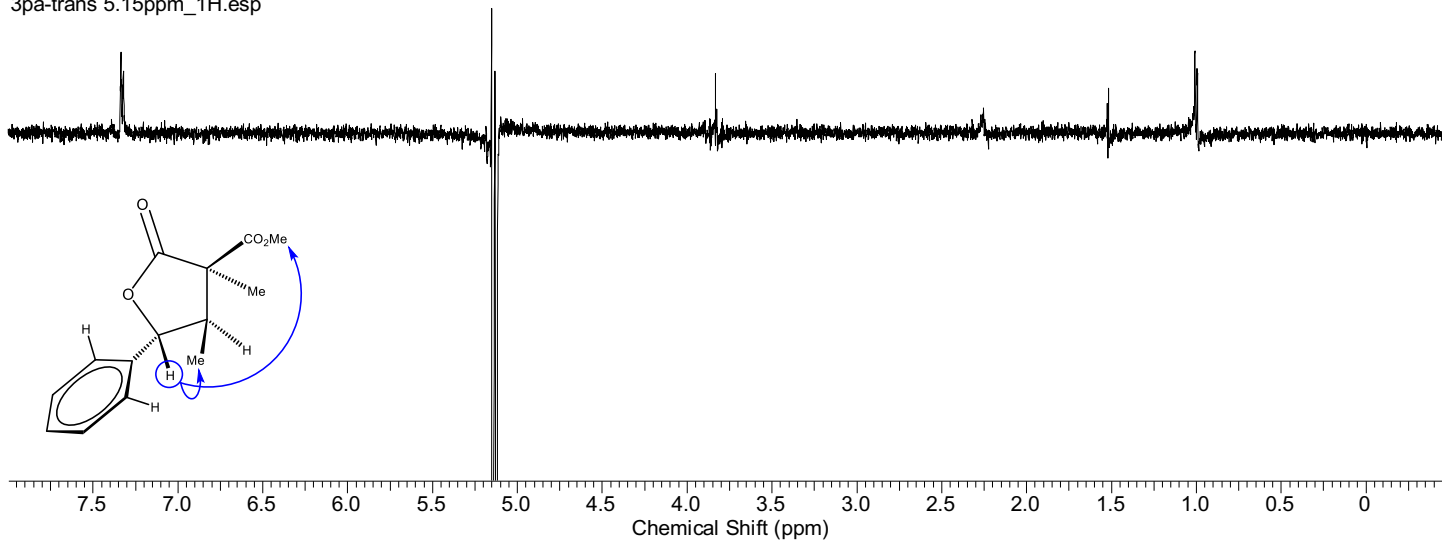

### Figure S6. Key NOE of Diastereomer 3

stilbene 3-A1H.esp

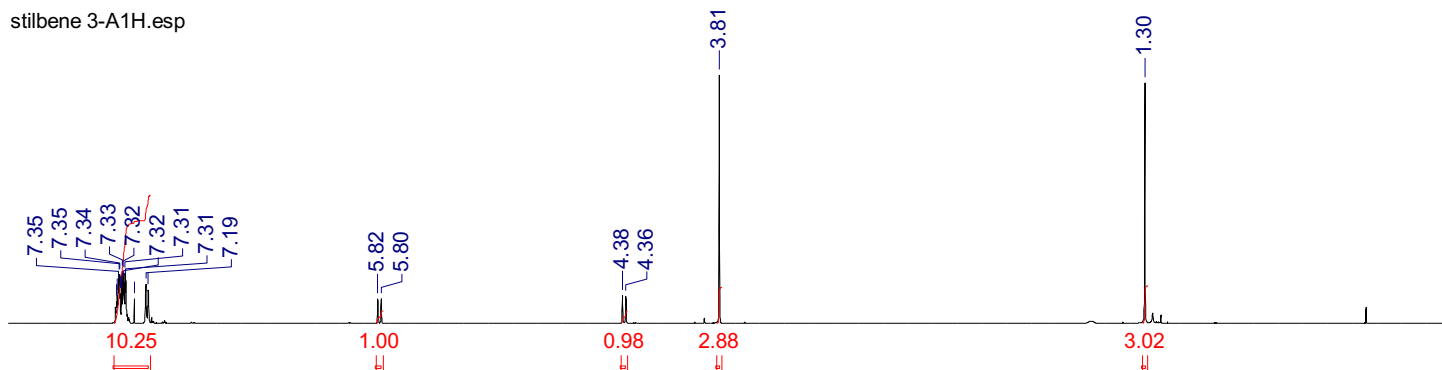

3-A noe 1.3ppm\_Me.esp

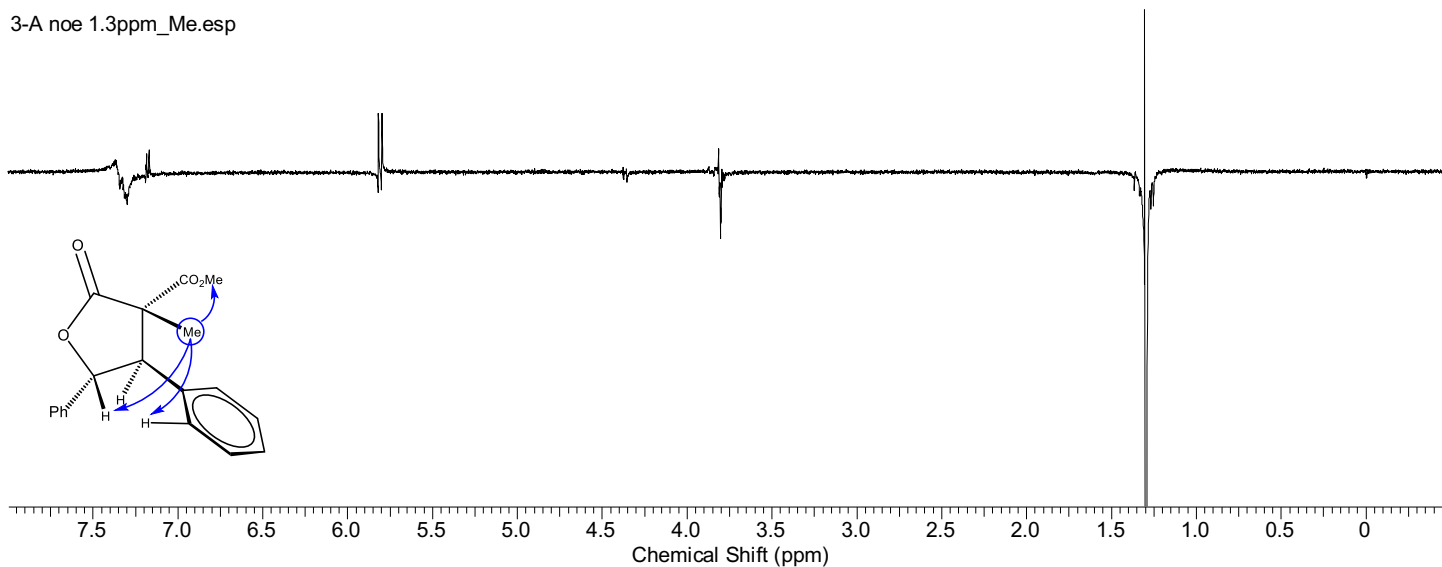

stilbene 3-A1H.esp

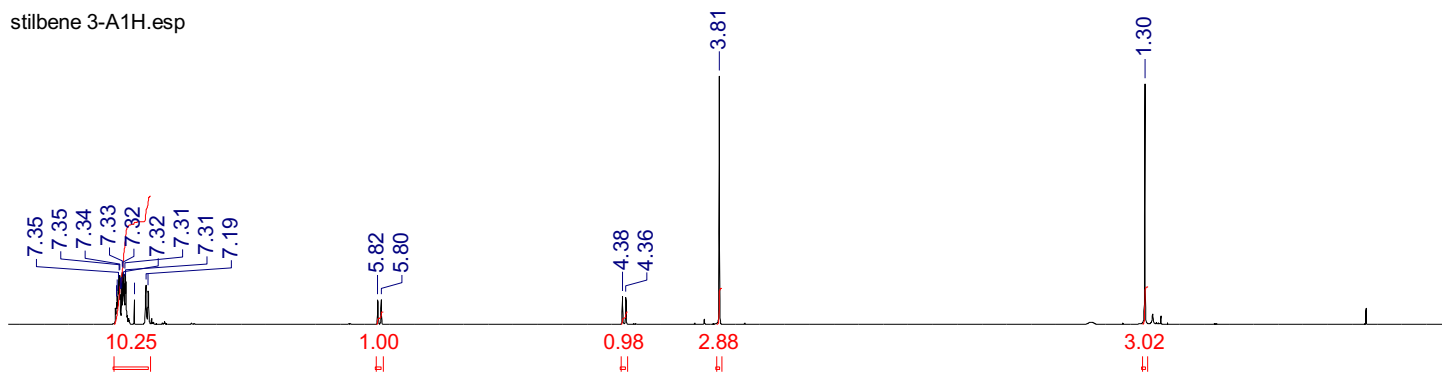

3-A noe 5.81ppm\_1H.esp

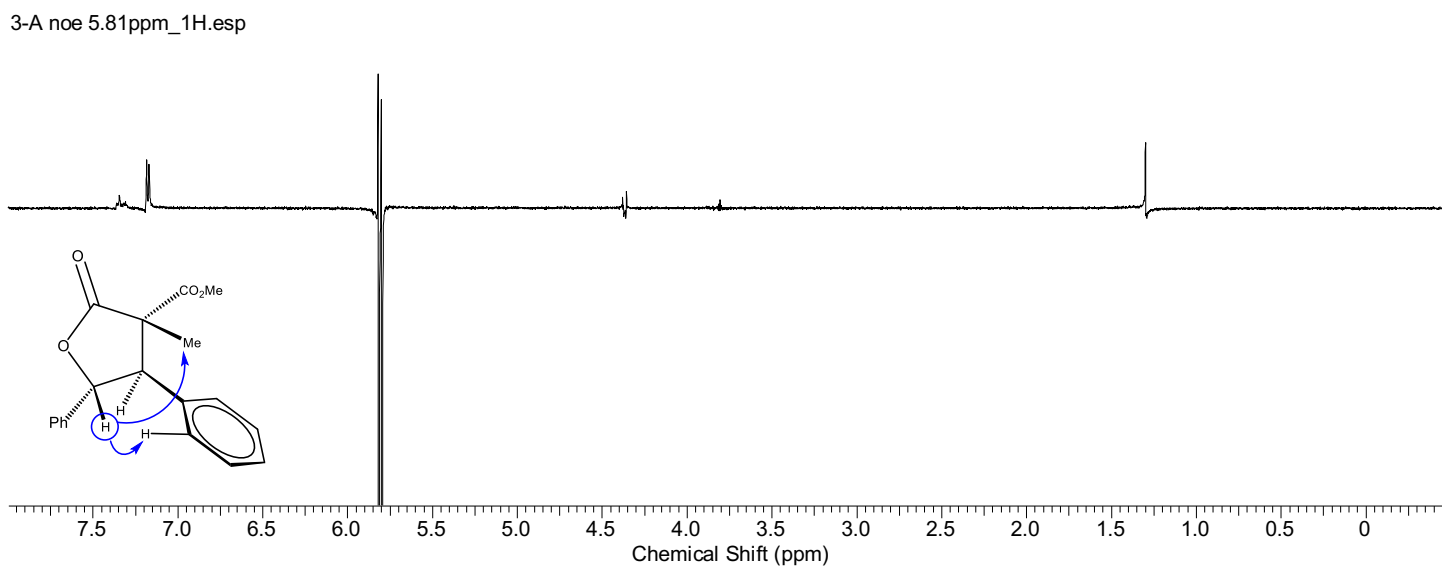

stilbene 3-B 1H.esp

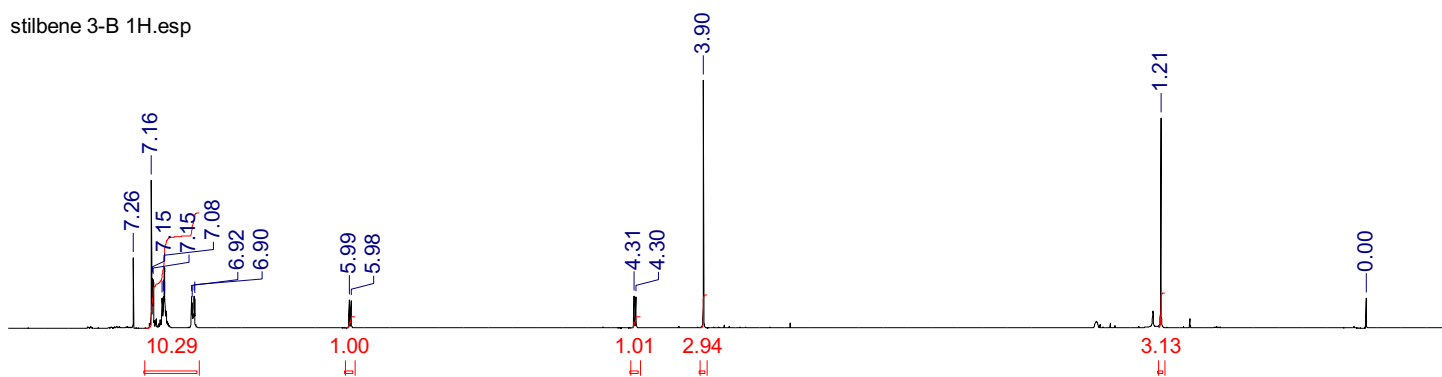

3-B noe 4.31ppm\_1H.esp

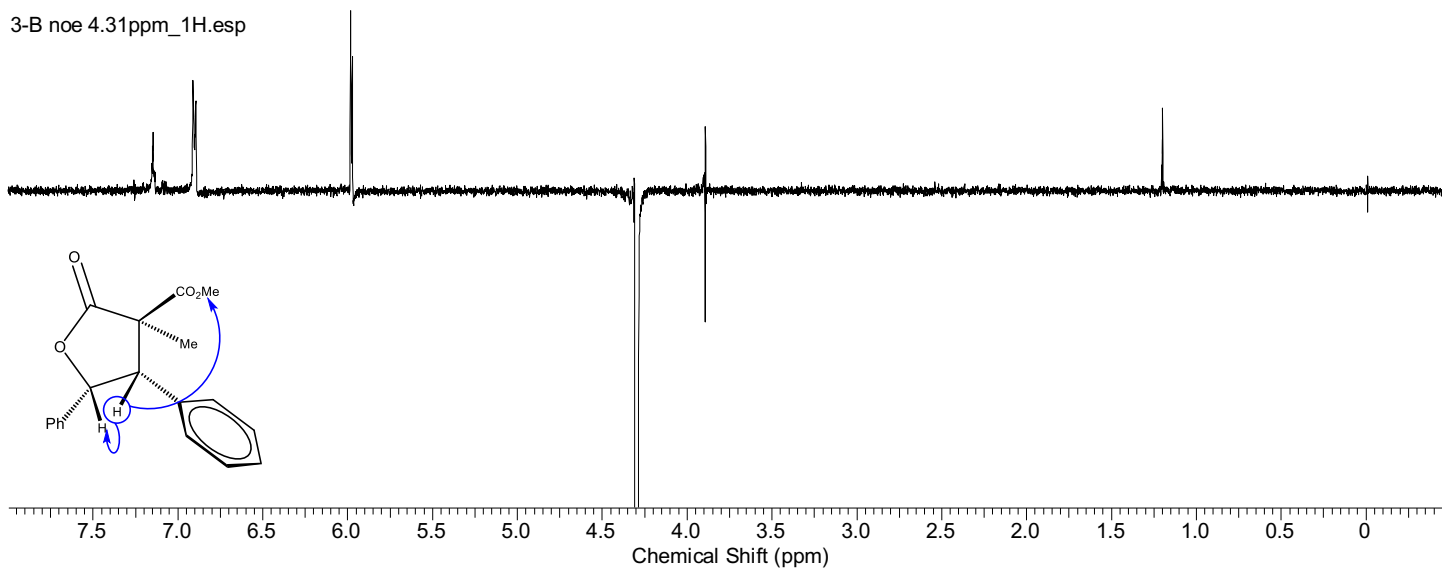

stilbene 3-B 1H.esp

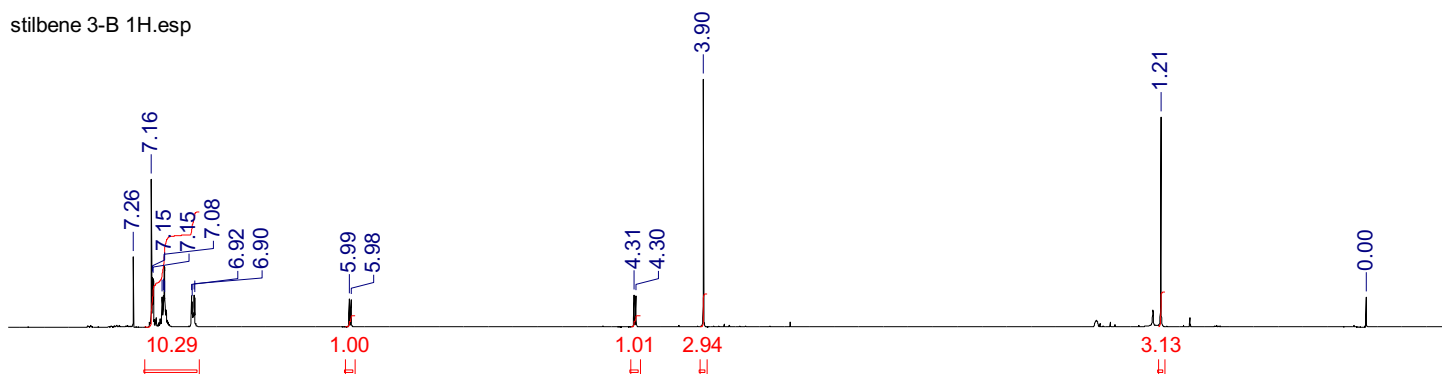

3-B noe 5.99ppm\_1H.esp

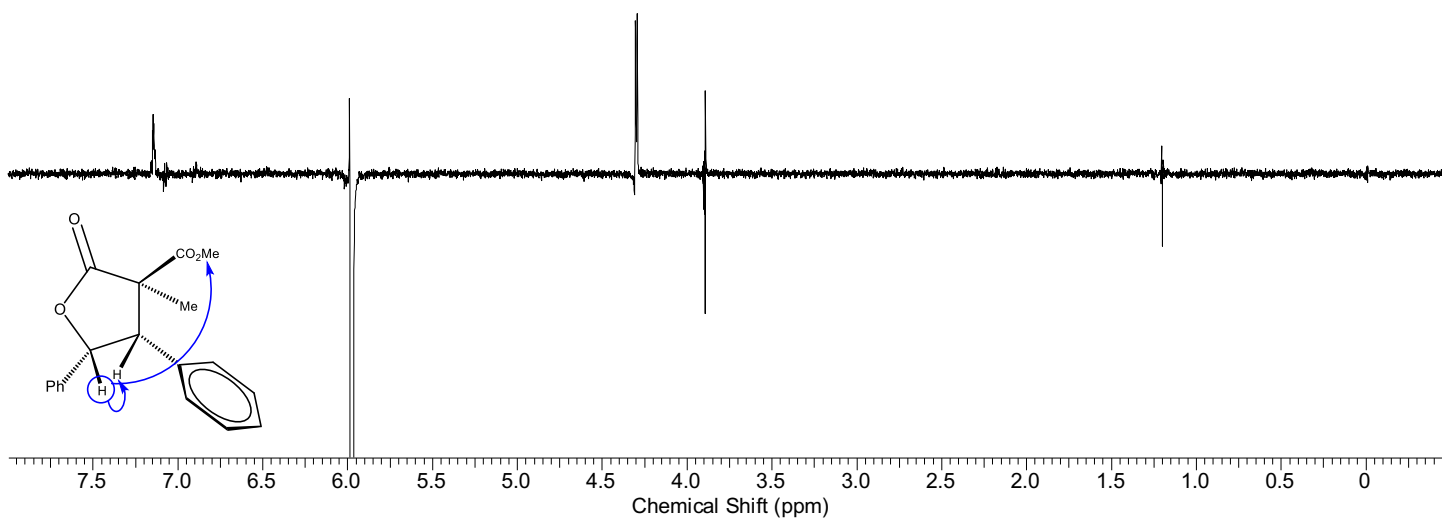

**Figure S7. Molecular structure of 3ha**

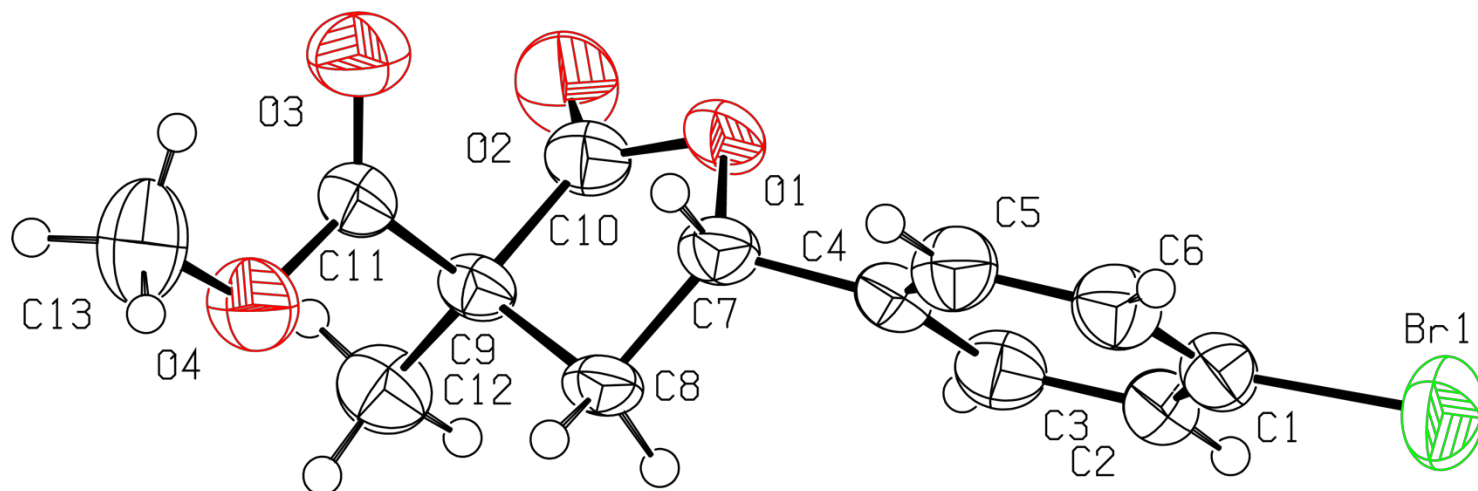

Molecular structure of **3ha** (ORTEP drawing; thermal ellipsoids set to 50% probability).



**Table S3. Experimental details**

|                                                                            |                                                  |
|----------------------------------------------------------------------------|--------------------------------------------------|
| Crystal data                                                               |                                                  |
| Chemical formula                                                           | C <sub>13</sub> H <sub>13</sub> BrO <sub>4</sub> |
| $M_r$                                                                      | 313.14                                           |
| Crystal system, space group                                                | Triclinic, $P\bar{1}$                            |
| Temperature (K)                                                            | 293                                              |
| $a, b, c$ (Å)                                                              | 8.848 (4), 12.172 (6), 12.759 (6)                |
| $\alpha, \beta, \gamma$ (°)                                                | 103.682 (7), 98.765 (5), 90.185 (7)              |
| $V$ (Å <sup>3</sup> )                                                      | 1318.4 (10)                                      |
| $Z$                                                                        | 4                                                |
| Radiation type                                                             | Mo $K\alpha$                                     |
| $\mu$ (mm <sup>-1</sup> )                                                  | 3.12                                             |
| Crystal size (mm)                                                          | 0.29 × 0.29 × 0.03                               |
| Data collection                                                            |                                                  |
| Diffractometer                                                             | Mercury CCD (2x2 bin mode)                       |
| Absorption correction                                                      | Numerical                                        |
| $T_{\min}, T_{\max}$                                                       | 0.465, 0.766                                     |
| No. of measured, independent and observed [ $I > 2\sigma(I)$ ] reflections | 11070, 6015, 3110                                |
| $R_{\text{int}}$                                                           | 0.044                                            |
| $(\sin \theta/\lambda)_{\text{max}}$ (Å <sup>-1</sup> )                    | 0.650                                            |
| Refinement                                                                 |                                                  |
| $R[F^2 > 2\sigma(F^2)], wR(F^2), S$                                        | 0.069, 0.176, 1.06                               |
| No. of reflections                                                         | 6015                                             |
| No. of parameters                                                          | 329                                              |
| H-atom treatment                                                           | H-atom parameters constrained                    |
| $\Delta_{\text{max}}, \Delta_{\text{min}}$ (e Å <sup>-3</sup> )            | 0.46, -0.52                                      |

Computer programs: *SHELXL2014/7* (Sheldrick, 2014).

**Table S4. Selected geometric parameters (Å, °)**

|            |           |             |           |
|------------|-----------|-------------|-----------|
| Br1—C1     | 1.891 (5) | C4—C7       | 1.490 (7) |
| Br2—C14    | 1.893 (5) | C5—C6       | 1.383 (7) |
| O1—C10     | 1.356 (6) | C7—C8       | 1.507 (7) |
| O1—C7      | 1.480 (5) | C8—C9       | 1.537 (6) |
| O2—C10     | 1.193 (5) | C9—C11      | 1.504 (6) |
| O3—C11     | 1.197 (6) | C9—C10      | 1.512 (6) |
| O4—C11     | 1.325 (6) | C9—C12      | 1.533 (7) |
| O4—C13     | 1.447 (6) | C14—C19     | 1.364 (8) |
| O5—C23     | 1.344 (6) | C14—C15     | 1.376 (7) |
| O5—C20     | 1.474 (5) | C15—C16     | 1.388 (7) |
| O6—C23     | 1.200 (5) | C16—C17     | 1.388 (7) |
| O7—C24     | 1.191 (6) | C17—C18     | 1.386 (7) |
| O8—C24     | 1.320 (5) | C17—C20     | 1.495 (7) |
| O8—C26     | 1.444 (6) | C18—C19     | 1.384 (8) |
| C1—C6      | 1.365 (7) | C20—C21     | 1.523 (7) |
| C1—C2      | 1.367 (6) | C21—C22     | 1.534 (6) |
| C2—C3      | 1.368 (7) | C22—C24     | 1.524 (7) |
| C3—C4      | 1.399 (6) | C22—C25     | 1.524 (7) |
| C4—C5      | 1.395 (7) | C22—C23     | 1.527 (6) |
|            |           |             |           |
| C10—O1—C7  | 109.9 (4) | O3—C11—C9   | 124.9 (5) |
| C11—O4—C13 | 118.4 (4) | O4—C11—C9   | 111.9 (4) |
| C23—O5—C20 | 109.9 (3) | C19—C14—C15 | 121.4 (5) |
| C24—O8—C26 | 117.2 (4) | C19—C14—Br2 | 118.9 (4) |
| C6—C1—C2   | 121.0 (5) | C15—C14—Br2 | 119.7 (5) |
| C6—C1—Br1  | 119.0 (4) | C14—C15—C16 | 118.7 (5) |
| C2—C1—Br1  | 120.1 (4) | C15—C16—C17 | 121.3 (5) |
| C1—C2—C3   | 119.7 (4) | C18—C17—C16 | 118.1 (5) |
| C2—C3—C4   | 121.5 (5) | C18—C17—C20 | 119.4 (5) |
| C5—C4—C3   | 117.2 (5) | C16—C17—C20 | 122.4 (5) |
| C5—C4—C7   | 119.8 (4) | C19—C18—C17 | 121.0 (5) |
| C3—C4—C7   | 123.0 (4) | C14—C19—C18 | 119.5 (5) |
| C6—C5—C4   | 120.9 (4) | O5—C20—C17  | 108.5 (4) |
| C1—C6—C5   | 119.6 (5) | O5—C20—C21  | 103.2 (4) |
| O1—C7—C4   | 107.6 (4) | C17—C20—C21 | 117.6 (4) |
| O1—C7—C8   | 103.3 (3) | C20—C21—C22 | 102.2 (4) |
| C4—C7—C8   | 118.1 (4) | C24—C22—C25 | 111.1 (4) |

|               |            |                 |            |
|---------------|------------|-----------------|------------|
| C7—C8—C9      | 101.9 (4)  | C24—C22—C23     | 106.3 (4)  |
| C11—C9—C10    | 107.9 (4)  | C25—C22—C23     | 112.3 (4)  |
| C11—C9—C12    | 111.0 (4)  | C24—C22—C21     | 109.9 (4)  |
| C10—C9—C12    | 111.8 (4)  | C25—C22—C21     | 116.0 (4)  |
| C11—C9—C8     | 109.3 (3)  | C23—C22—C21     | 100.4 (4)  |
| C10—C9—C8     | 101.1 (4)  | O6—C23—O5       | 121.9 (4)  |
| C12—C9—C8     | 115.1 (4)  | O6—C23—C22      | 127.7 (5)  |
| O2—C10—O1     | 122.3 (5)  | O5—C23—C22      | 110.4 (4)  |
| O2—C10—C9     | 128.2 (5)  | O7—C24—O8       | 124.0 (5)  |
| O1—C10—C9     | 109.5 (4)  | O7—C24—C22      | 125.2 (5)  |
| O3—C11—O4     | 123.2 (5)  | O8—C24—C22      | 110.7 (4)  |
|               |            |                 |            |
| C6—C1—C2—C3   | 3.0 (8)    | C19—C14—C15—C16 | 1.5 (7)    |
| Br1—C1—C2—C3  | -176.9 (4) | Br2—C14—C15—C16 | -178.4 (3) |
| C1—C2—C3—C4   | -0.6 (8)   | C14—C15—C16—C17 | 0.6 (7)    |
| C2—C3—C4—C5   | -1.7 (8)   | C15—C16—C17—C18 | -2.3 (7)   |
| C2—C3—C4—C7   | 178.2 (5)  | C15—C16—C17—C20 | 177.5 (4)  |
| C3—C4—C5—C6   | 1.6 (8)    | C16—C17—C18—C19 | 1.9 (7)    |
| C7—C4—C5—C6   | -178.3 (5) | C20—C17—C18—C19 | -177.9 (4) |
| C2—C1—C6—C5   | -3.0 (8)   | C15—C14—C19—C18 | -1.8 (7)   |
| Br1—C1—C6—C5  | 176.9 (4)  | Br2—C14—C19—C18 | 178.0 (4)  |
| C4—C5—C6—C1   | 0.7 (8)    | C17—C18—C19—C14 | 0.1 (7)    |
| C10—O1—C7—C4  | 147.7 (4)  | C23—O5—C20—C17  | 148.0 (4)  |
| C10—O1—C7—C8  | 22.1 (5)   | C23—O5—C20—C21  | 22.5 (5)   |
| C5—C4—C7—O1   | 123.6 (5)  | C18—C17—C20—O5  | 124.4 (4)  |
| C3—C4—C7—O1   | -56.3 (6)  | C16—C17—C20—O5  | -55.4 (6)  |
| C5—C4—C7—C8   | -120.2 (5) | C18—C17—C20—C21 | -119.1 (5) |
| C3—C4—C7—C8   | 60.0 (6)   | C16—C17—C20—C21 | 61.1 (6)   |
| O1—C7—C8—C9   | -35.5 (4)  | O5—C20—C21—C22  | -35.4 (5)  |
| C4—C7—C8—C9   | -154.0 (4) | C17—C20—C21—C22 | -154.8 (4) |
| C7—C8—C9—C11  | -78.0 (4)  | C20—C21—C22—C24 | -77.1 (5)  |
| C7—C8—C9—C10  | 35.6 (4)   | C20—C21—C22—C25 | 155.8 (4)  |
| C7—C8—C9—C12  | 156.3 (4)  | C20—C21—C22—C23 | 34.5 (5)   |
| C7—O1—C10—O2  | -177.8 (5) | C20—O5—C23—O6   | -177.7 (5) |
| C7—O1—C10—C9  | 1.5 (5)    | C20—O5—C23—C22  | 0.3 (6)    |
| C11—C9—C10—O2 | -89.8 (6)  | C24—C22—C23—O6  | -90.3 (6)  |
| C12—C9—C10—O2 | 32.5 (7)   | C25—C22—C23—O6  | 31.4 (8)   |
| C8—C9—C10—O2  | 155.4 (5)  | C21—C22—C23—O6  | 155.3 (6)  |
| C11—C9—C10—O1 | 91.0 (5)   | C24—C22—C23—O5  | 91.8 (5)   |

|               |            |                |            |
|---------------|------------|----------------|------------|
| C12—C9—C10—O1 | -146.7 (4) | C25—C22—C23—O5 | -146.5 (5) |
| C8—C9—C10—O1  | -23.7 (5)  | C21—C22—C23—O5 | -22.6 (5)  |
| C13—O4—C11—O3 | -4.8 (8)   | C26—O8—C24—O7  | -1.9 (8)   |
| C13—O4—C11—C9 | 173.0 (4)  | C26—O8—C24—C22 | 175.7 (4)  |
| C10—C9—C11—O3 | -3.7 (7)   | C25—C22—C24—O7 | -123.5 (6) |
| C12—C9—C11—O3 | -126.6 (6) | C23—C22—C24—O7 | -1.1 (7)   |
| C8—C9—C11—O3  | 105.4 (6)  | C21—C22—C24—O7 | 106.8 (6)  |
| C10—C9—C11—O4 | 178.5 (4)  | C25—C22—C24—O8 | 59.0 (5)   |
| C12—C9—C11—O4 | 55.6 (5)   | C23—C22—C24—O8 | -178.6 (4) |
| C8—C9—C11—O4  | -72.4 (5)  | C21—C22—C24—O8 | -70.8 (5)  |

### **Reference**

S1 S. Maejima, E. Yamaguchi, A. Itoh, *Adv. Synth. Catal.* **2017**, *359*, 3883-3887.
